# Supplementary material for: Transition metal-free procedure for the synthesis of S-aryl dithiocarbamates using aryl diazonium fluoroborate in water at room temperature
Source: Royal Society of Chemistry journal article supplement (doi:10.1039/c1gc00001b), 2011-01-01

## Electronic Supplementary Information

### Transition metal free procedure for the synthesis of S-aryl dithiocarbamates using aryl diazonium fluoroborate in water at room temperature

Tanmay Chatterjee, Sukalyan Bhadra and Brindaban C. Ranu\*

#### Table of Contents

|                                                                                                                            |      |
|----------------------------------------------------------------------------------------------------------------------------|------|
| <sup>1</sup> H and <sup>13</sup> C NMR spectra of all the compounds mentioned in Table 1 and compound <b>1</b> in scheme 2 | 2-24 |
|----------------------------------------------------------------------------------------------------------------------------|------|

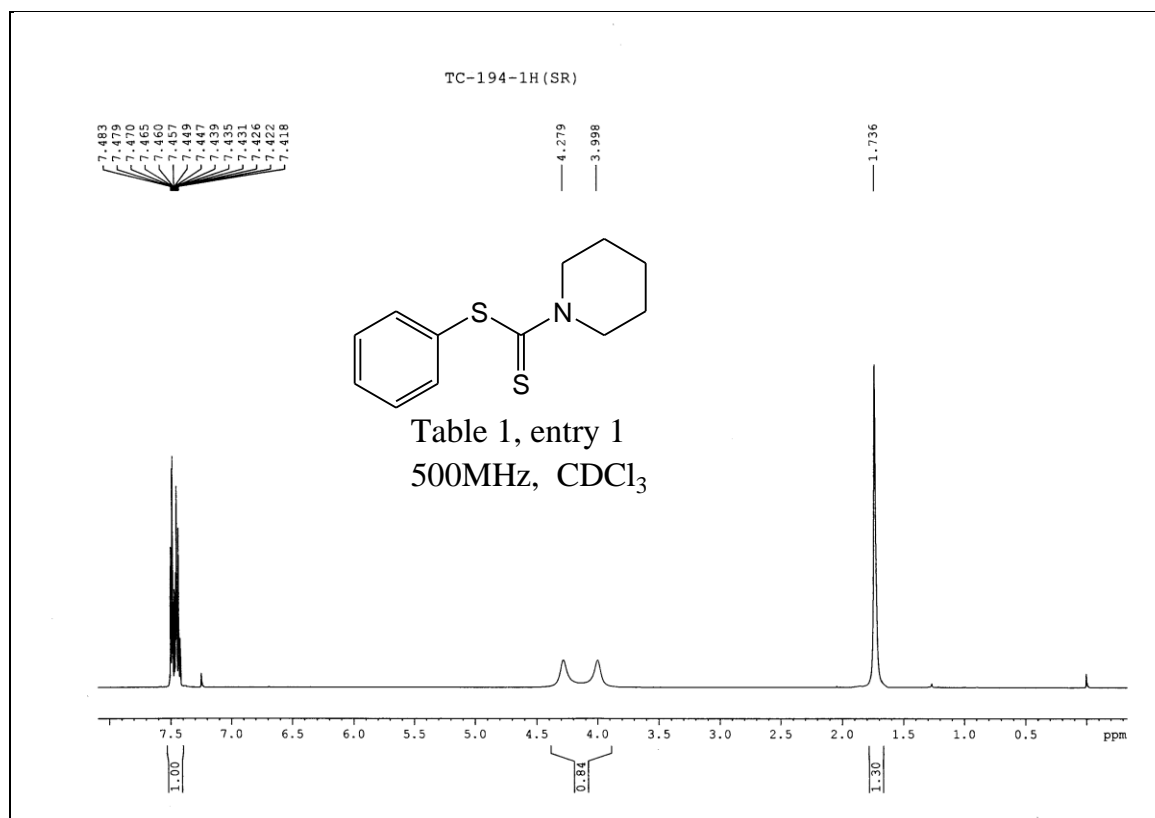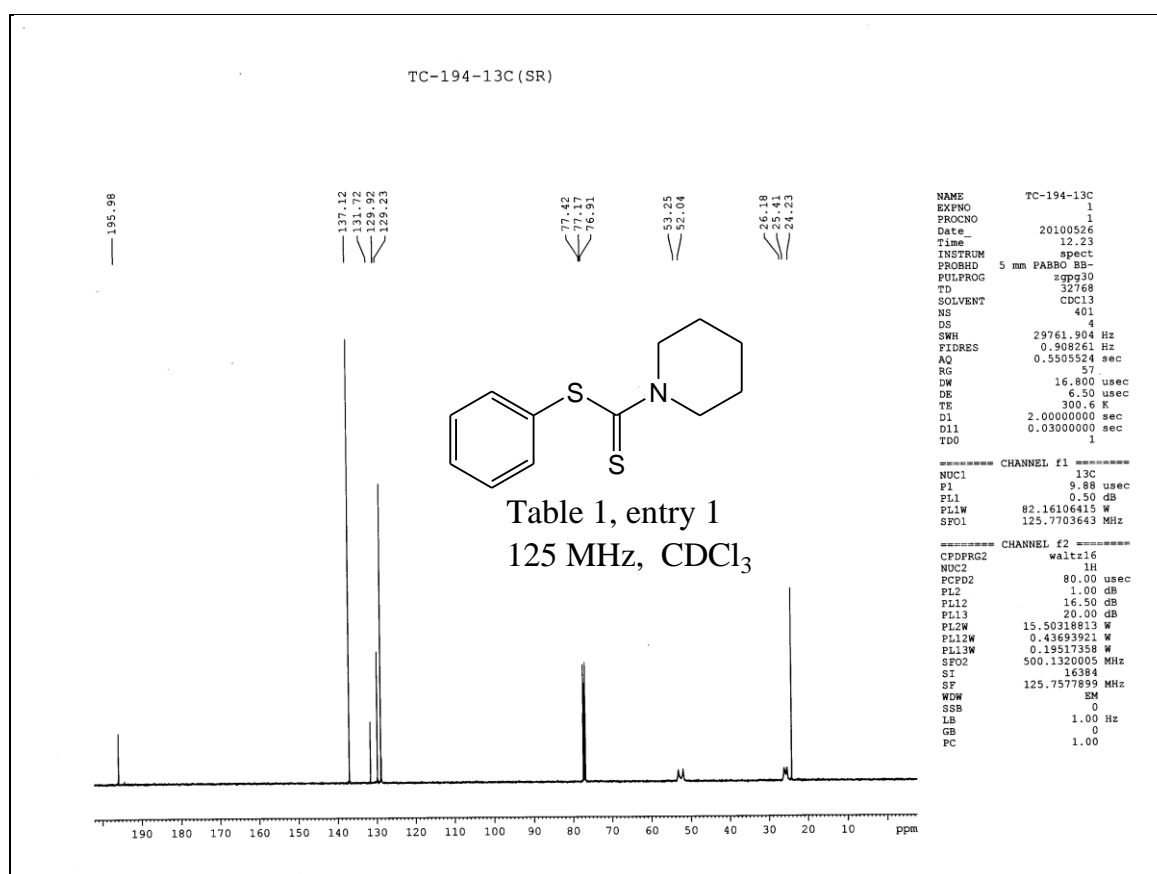

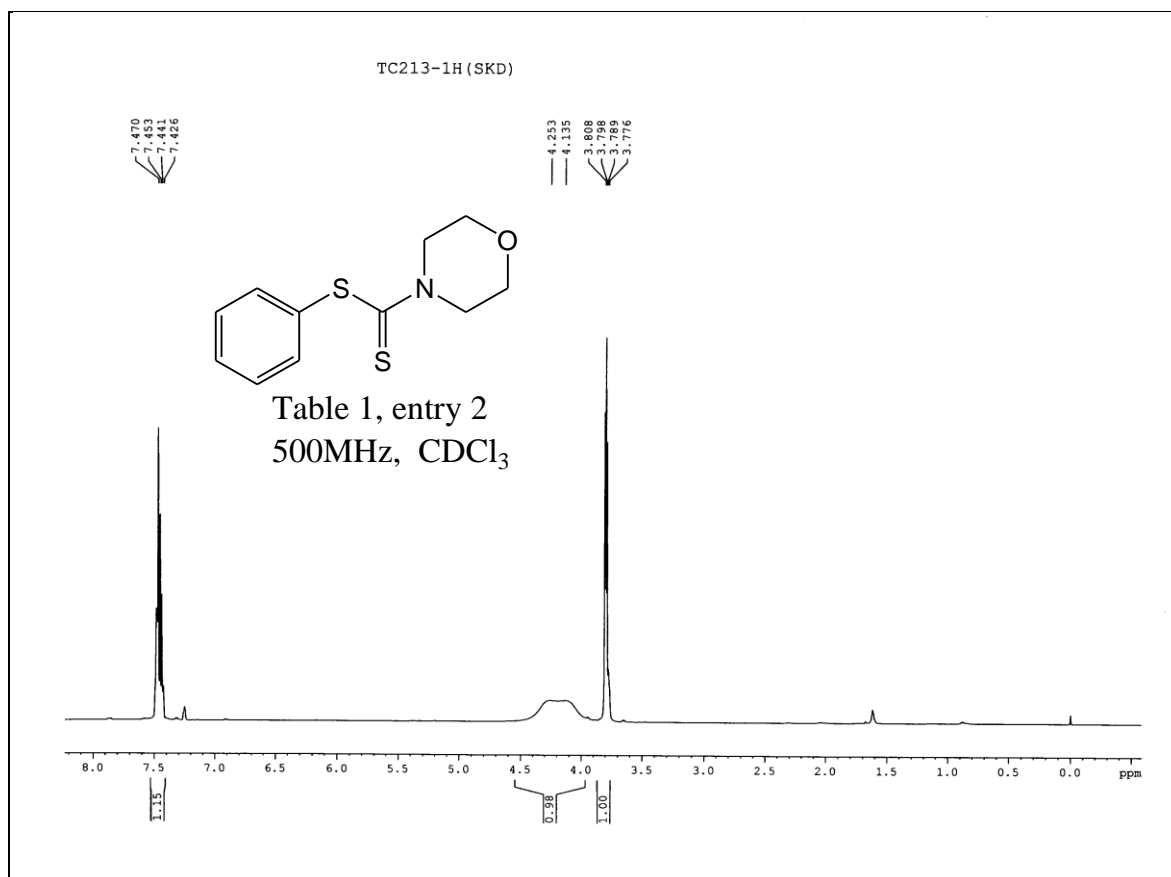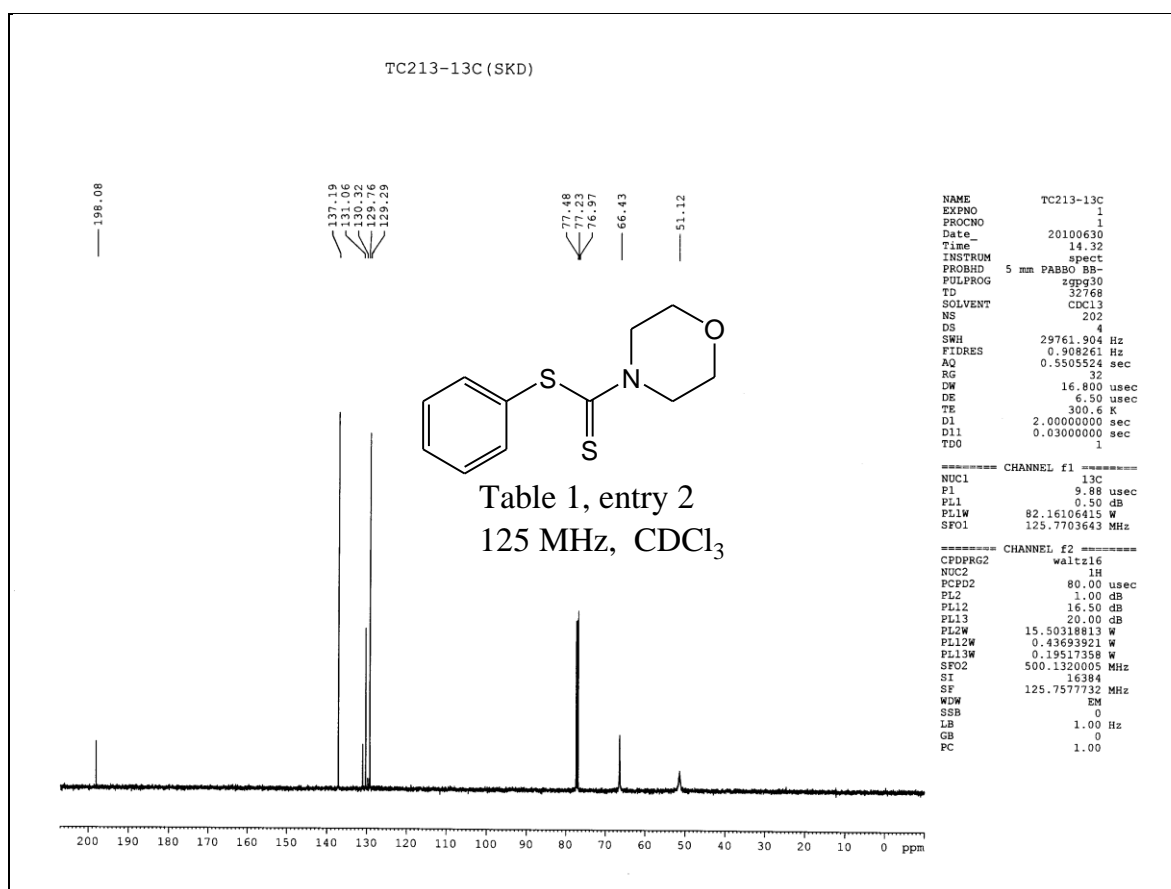

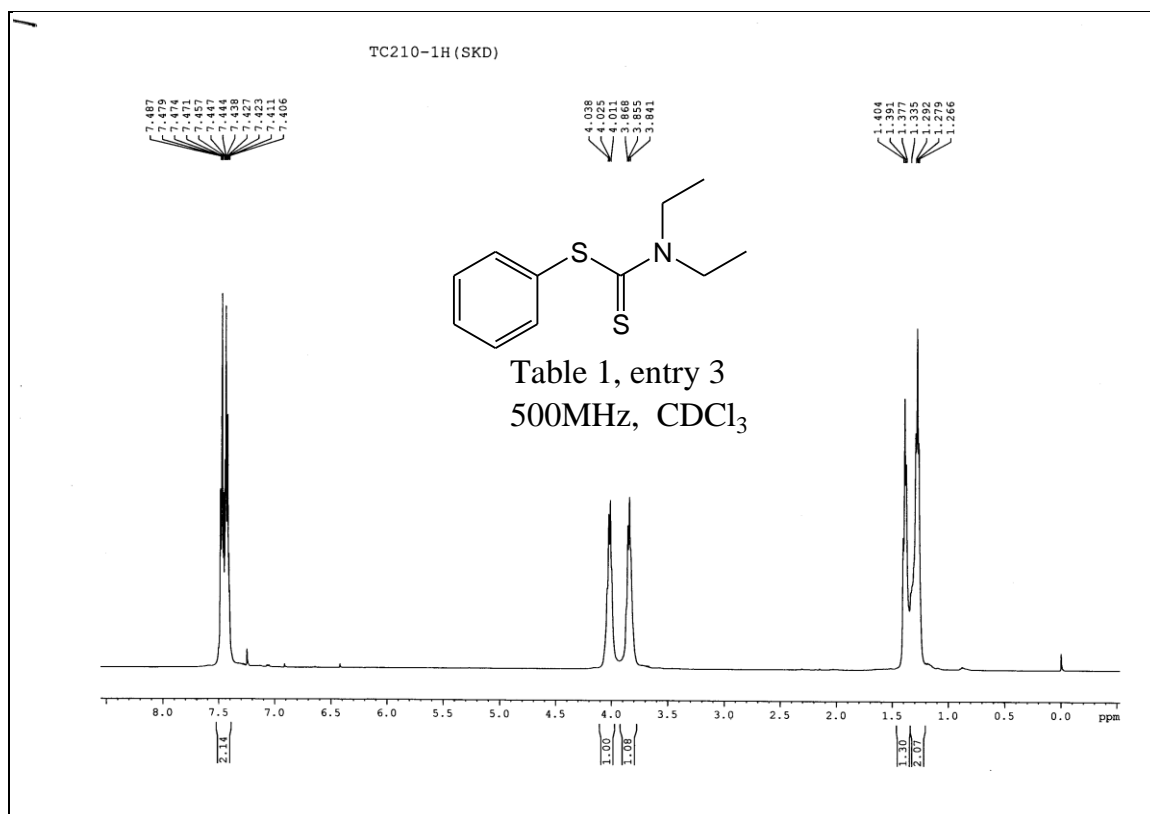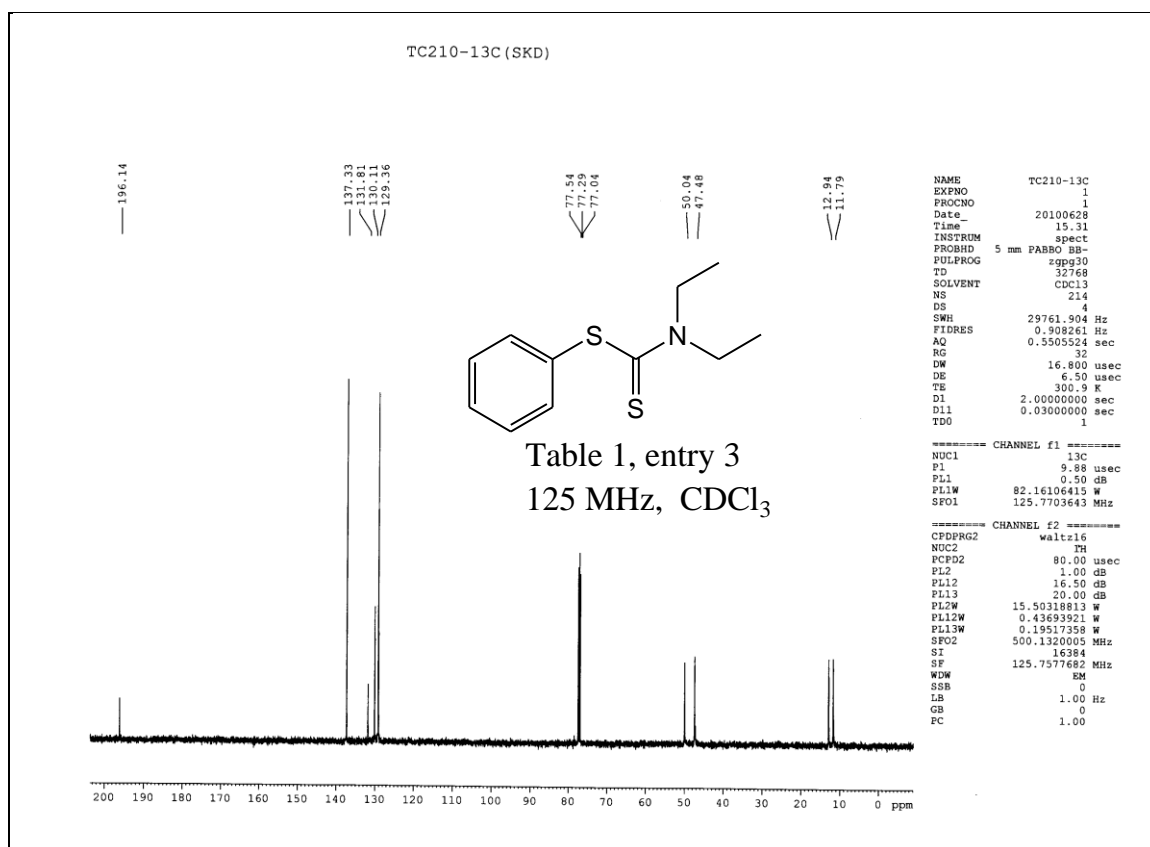

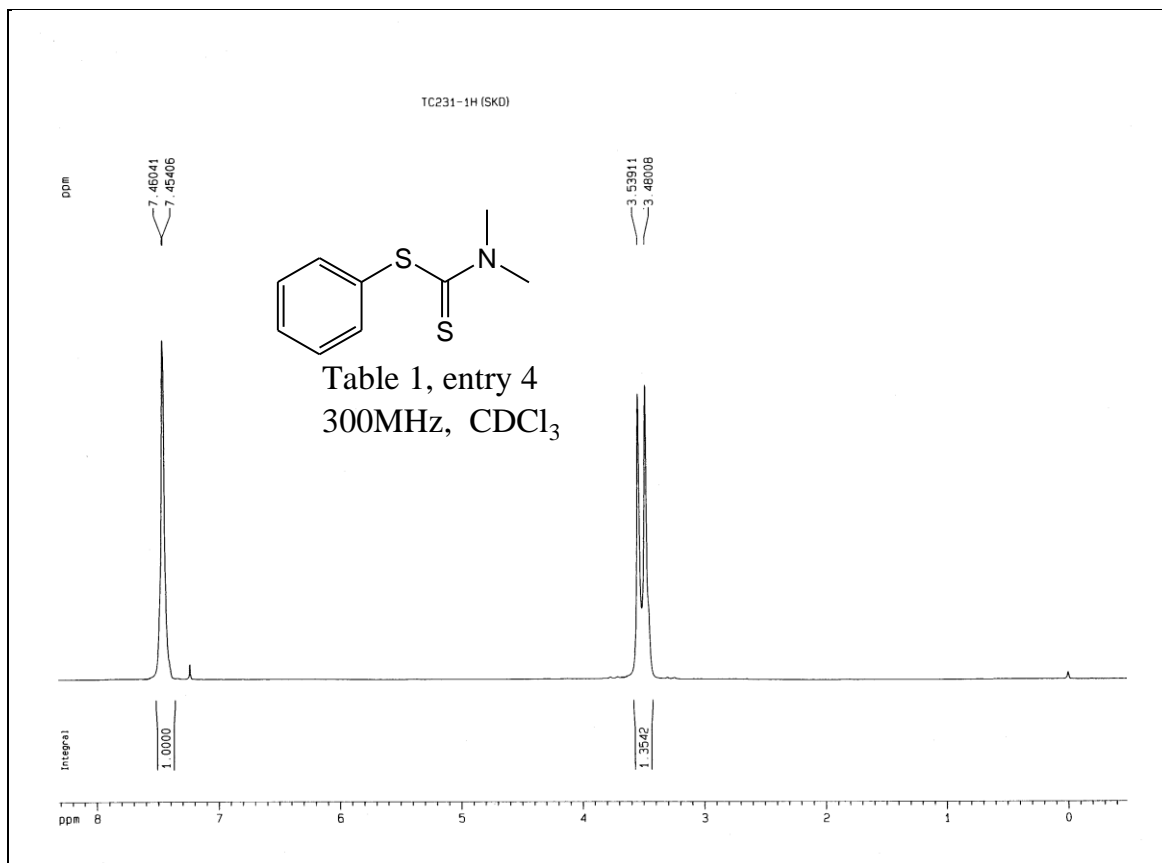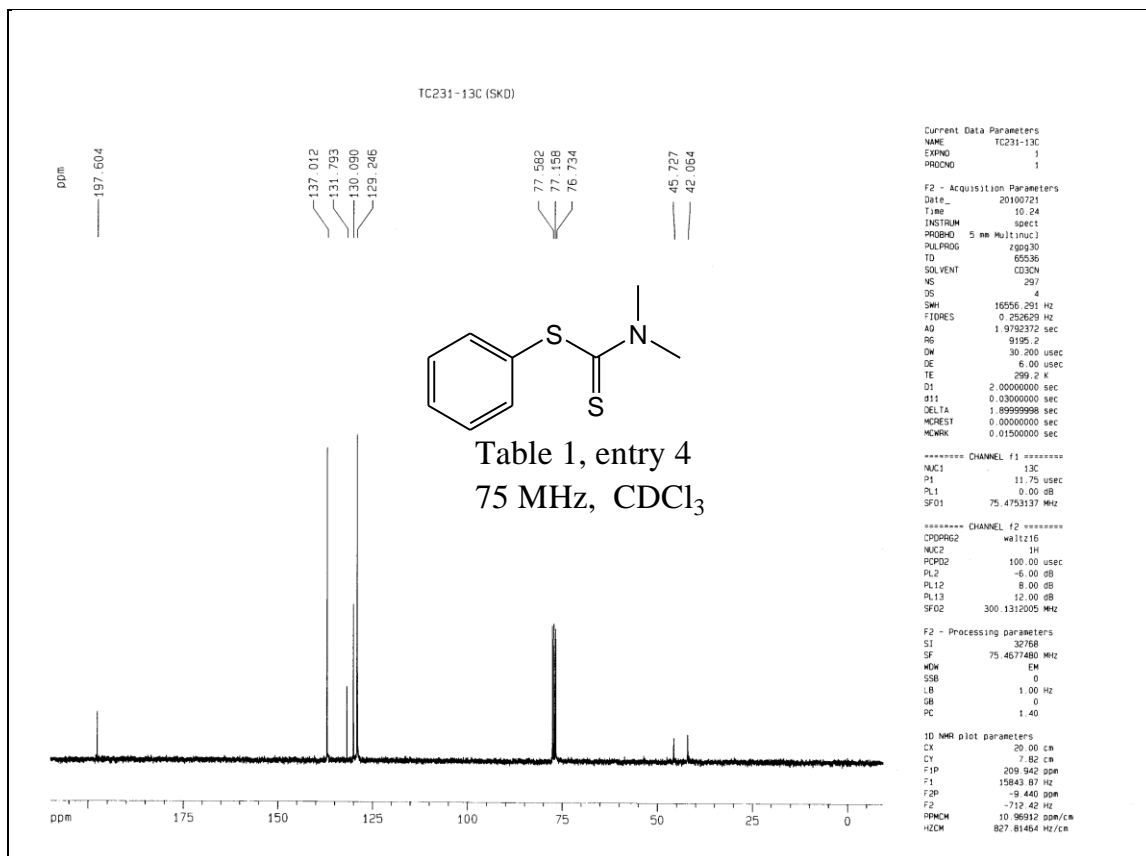

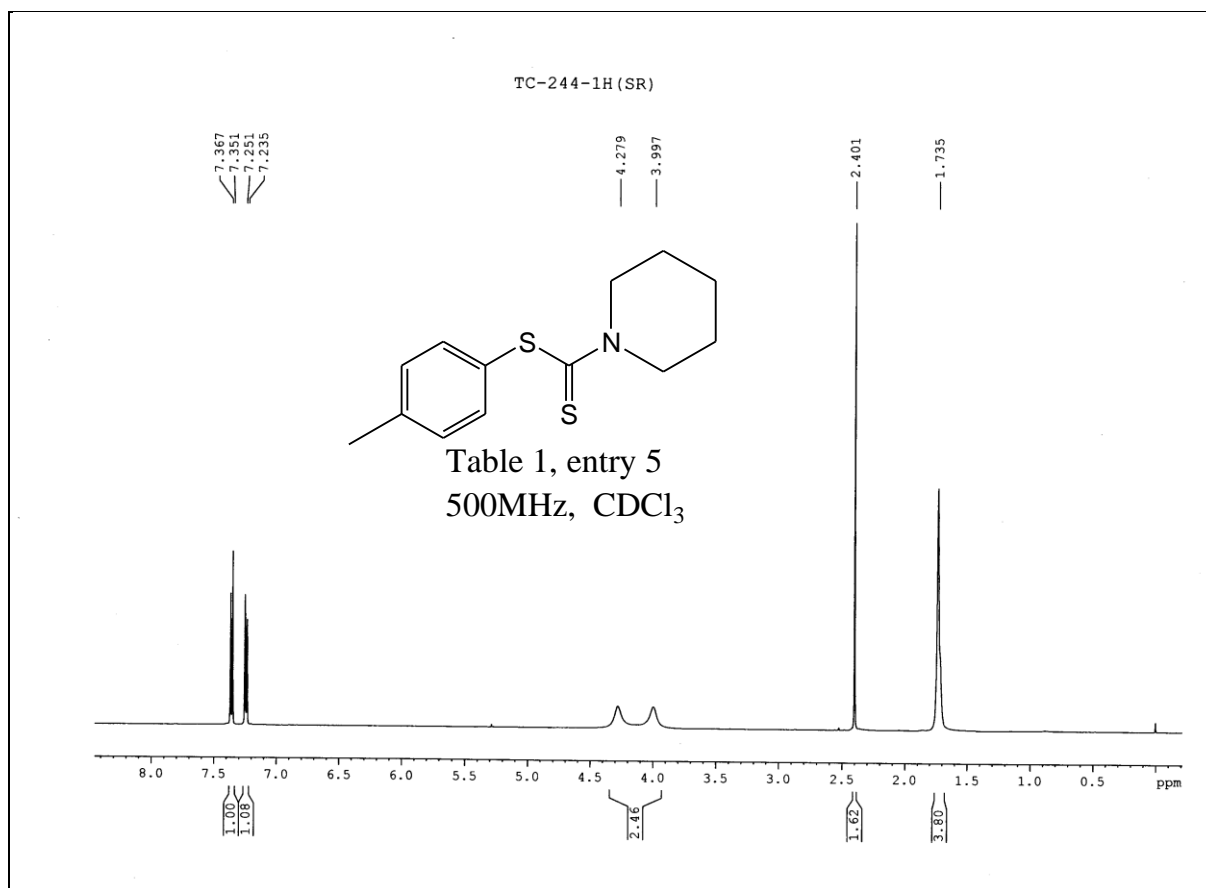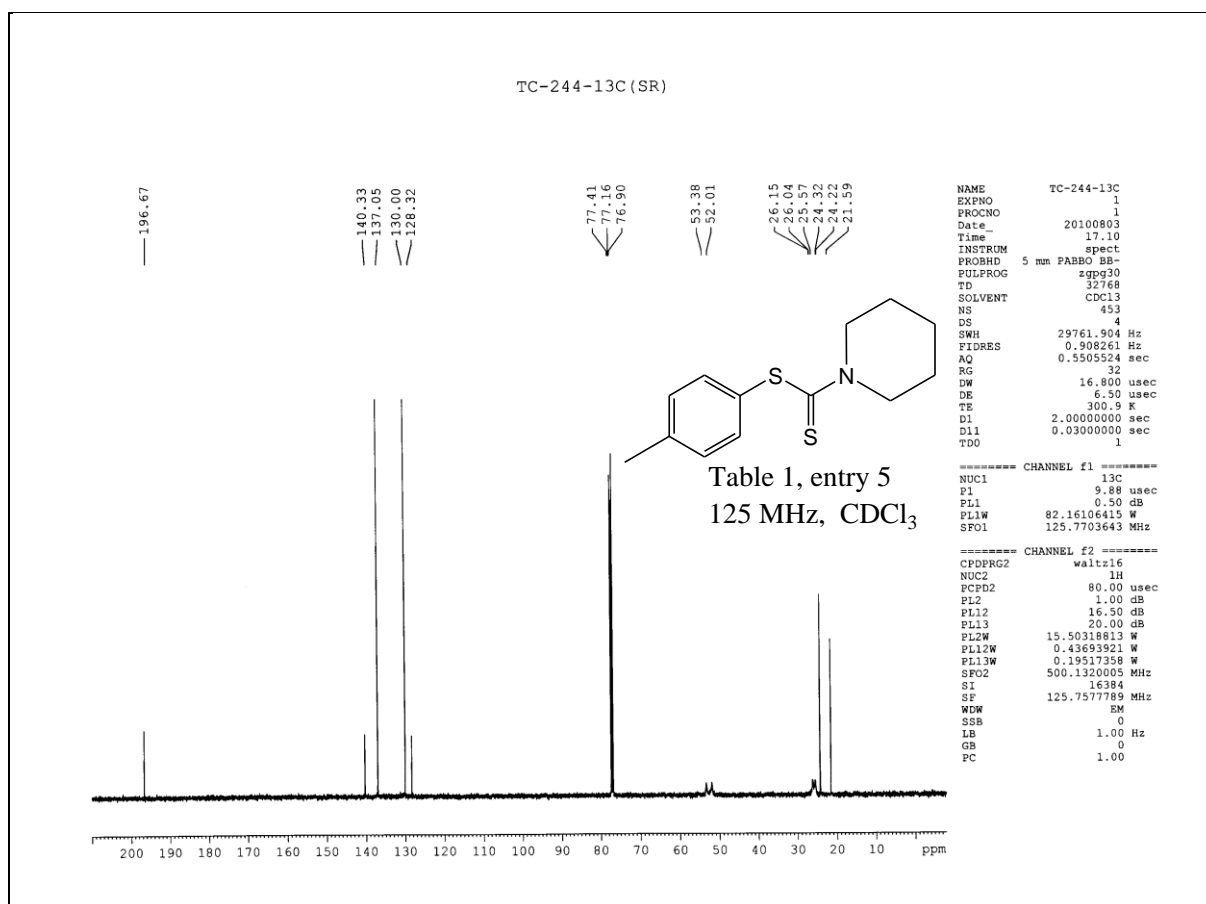



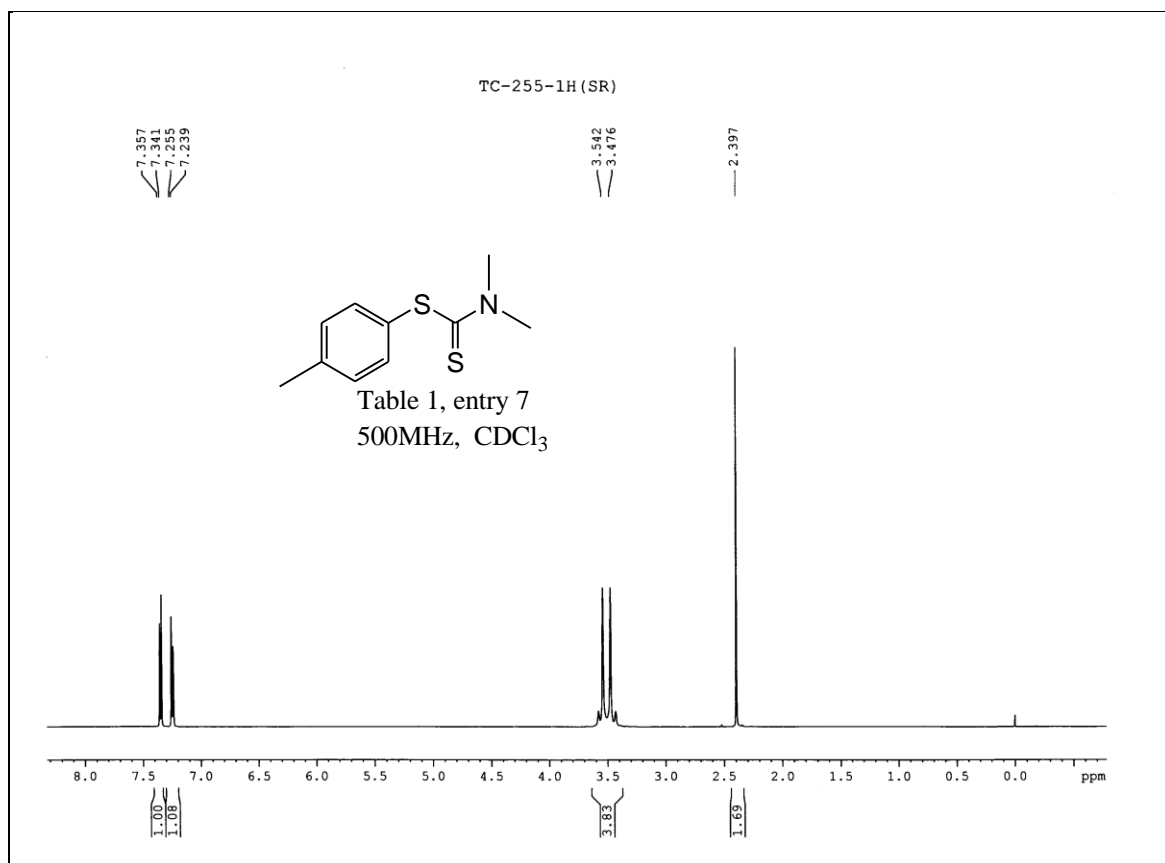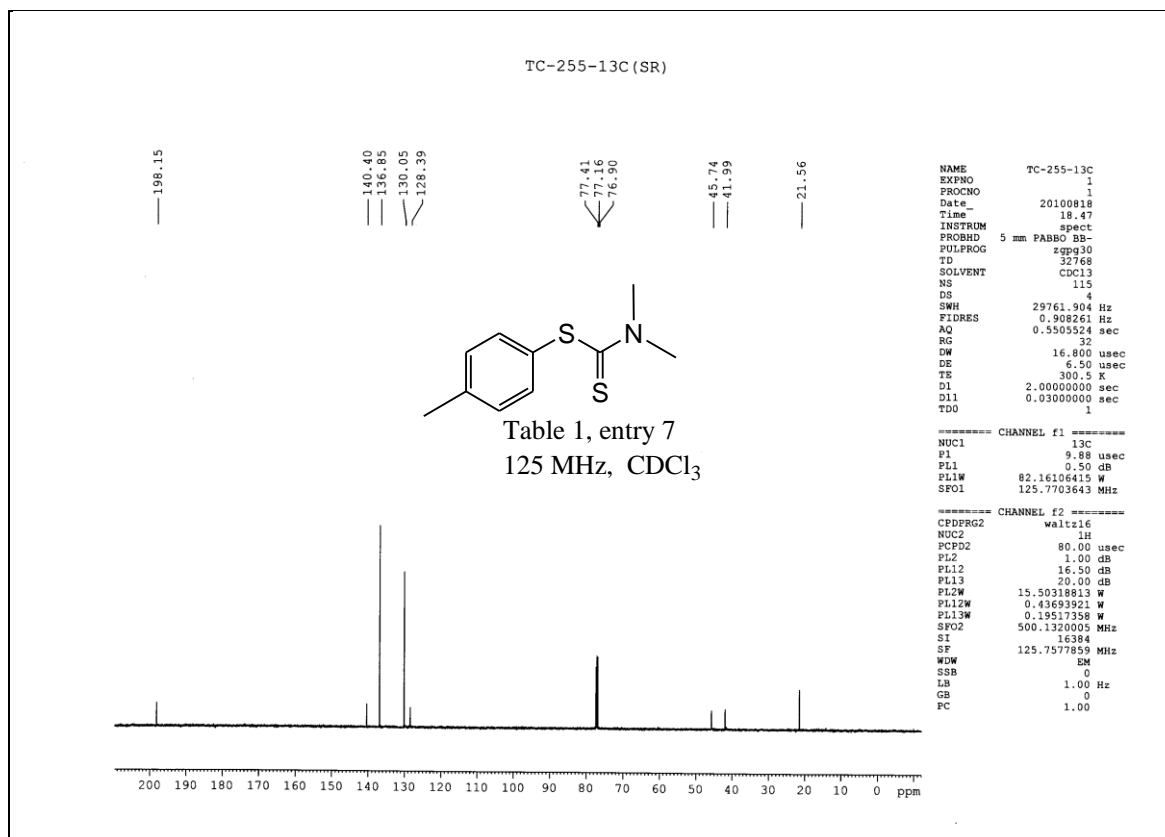



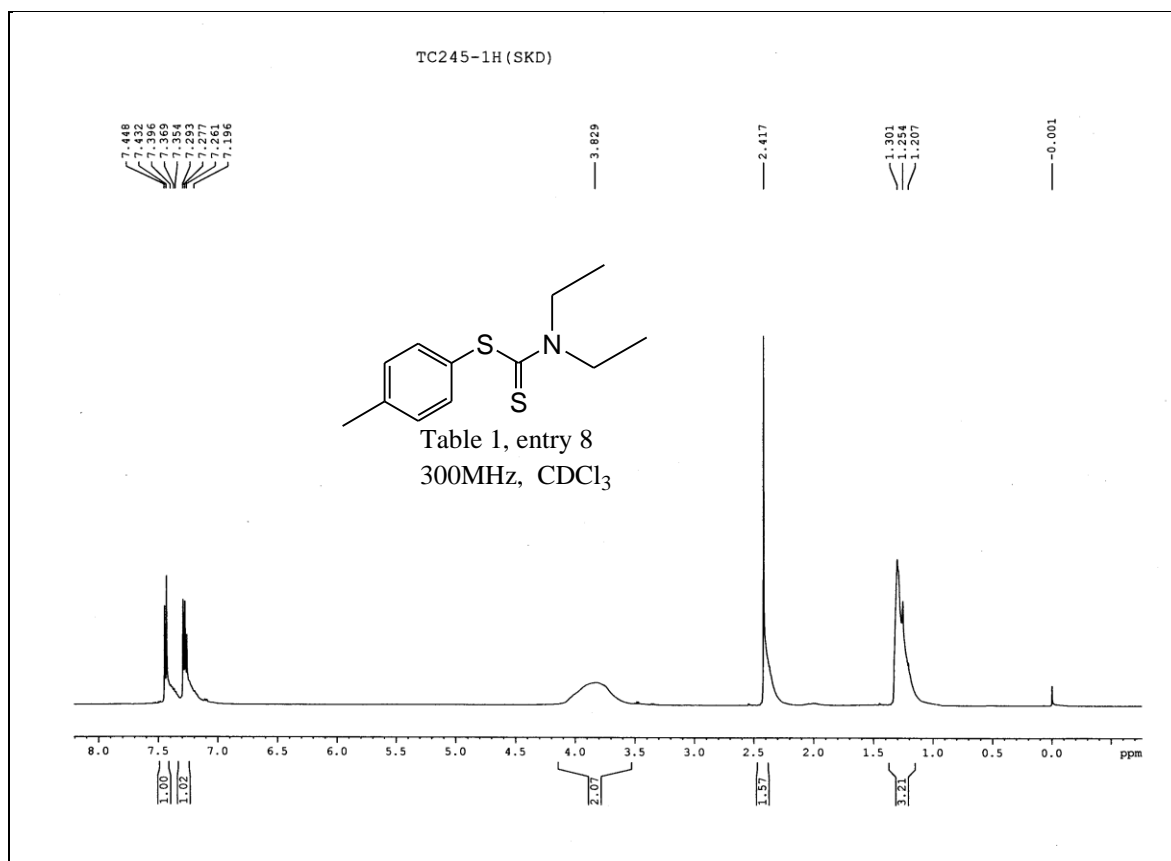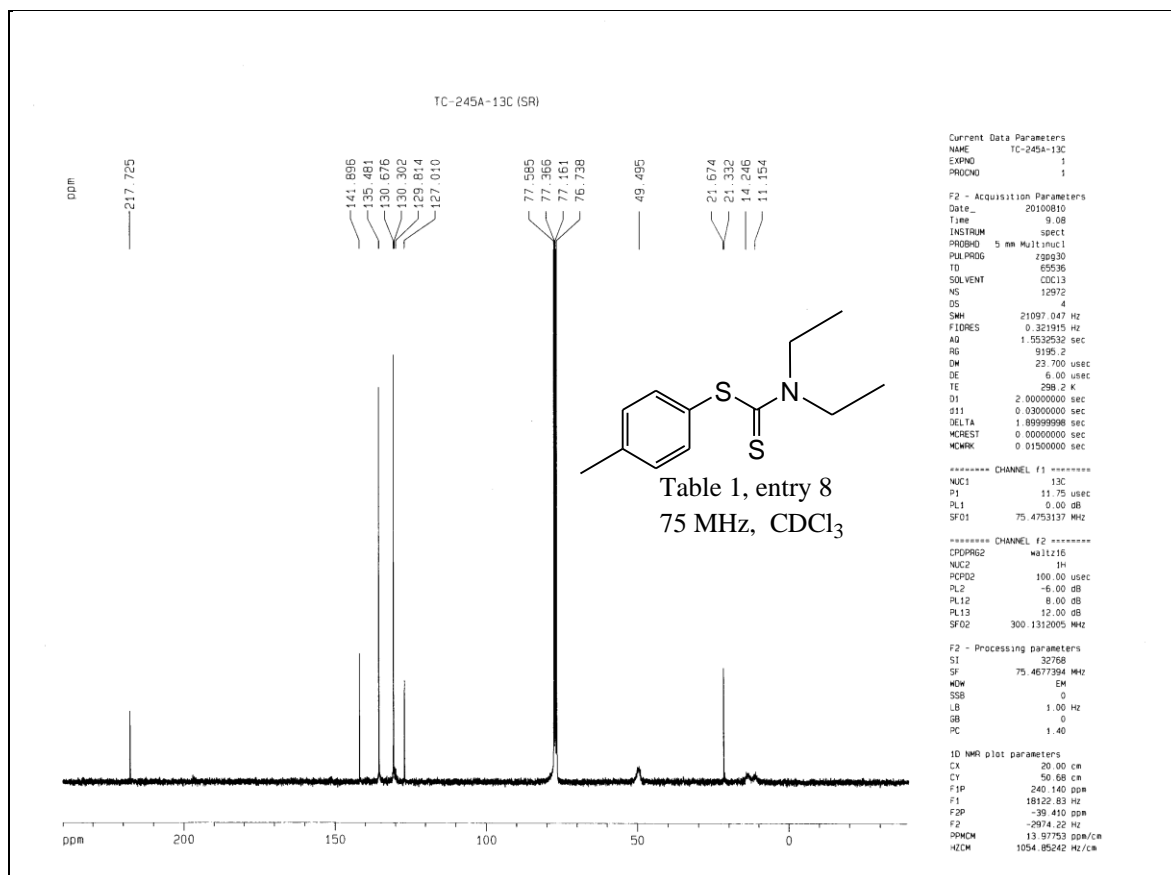

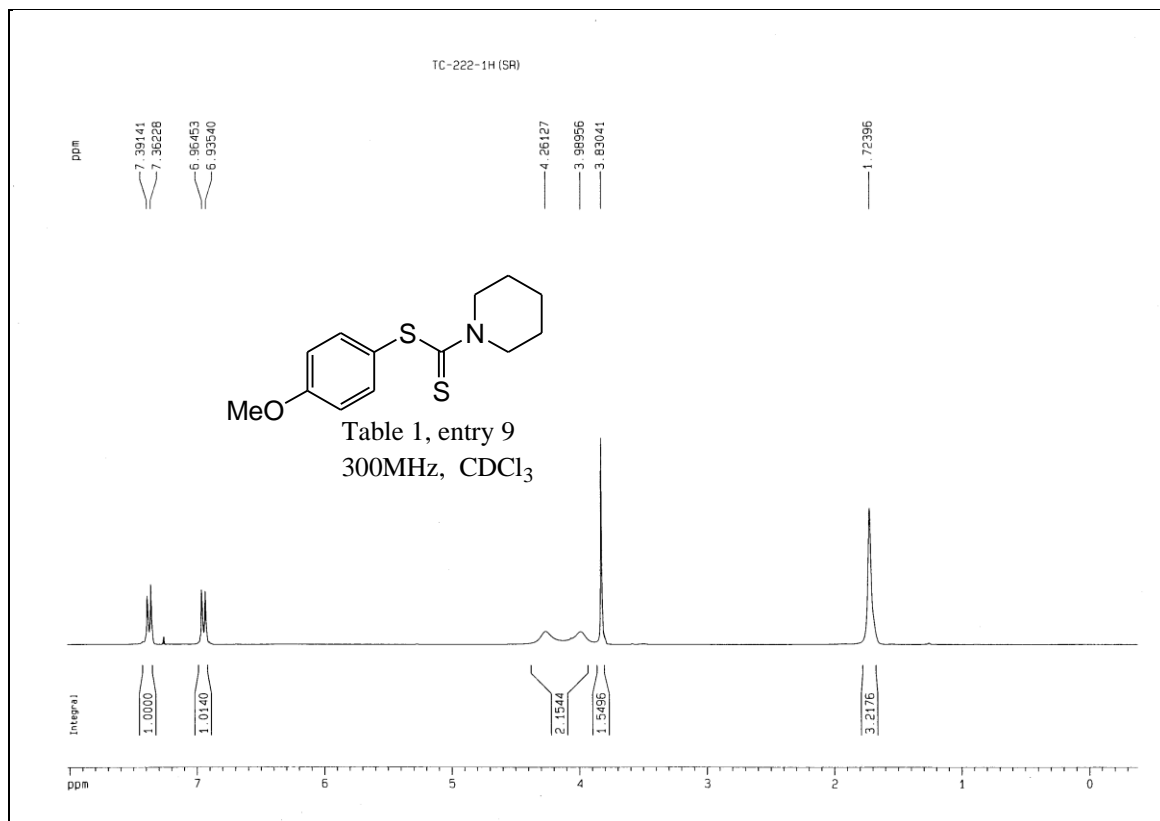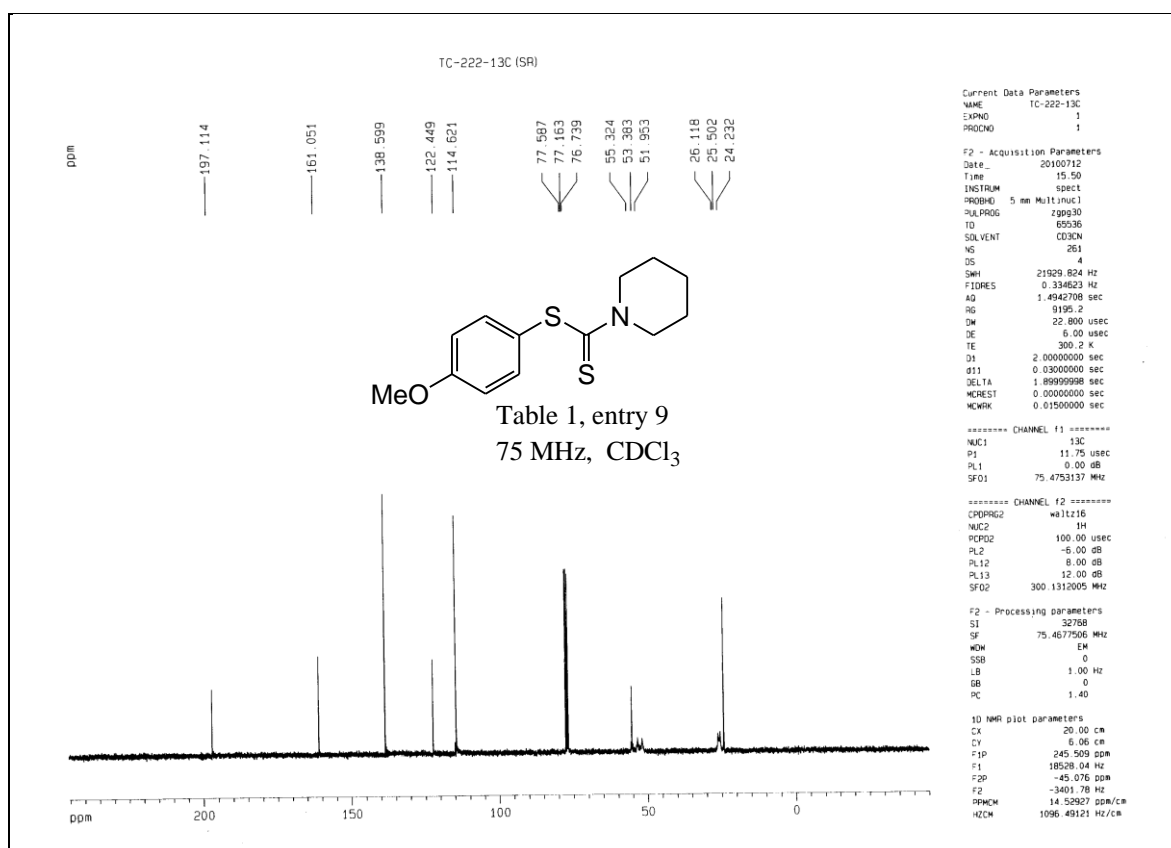

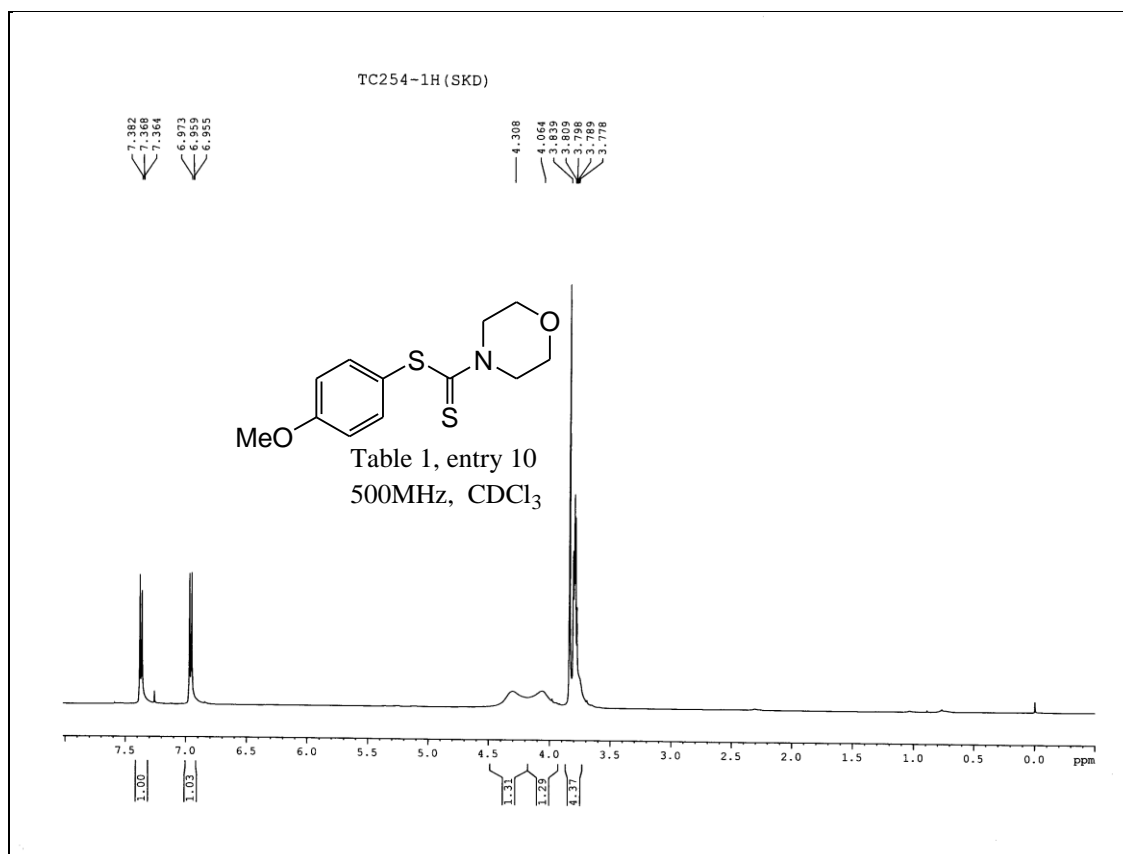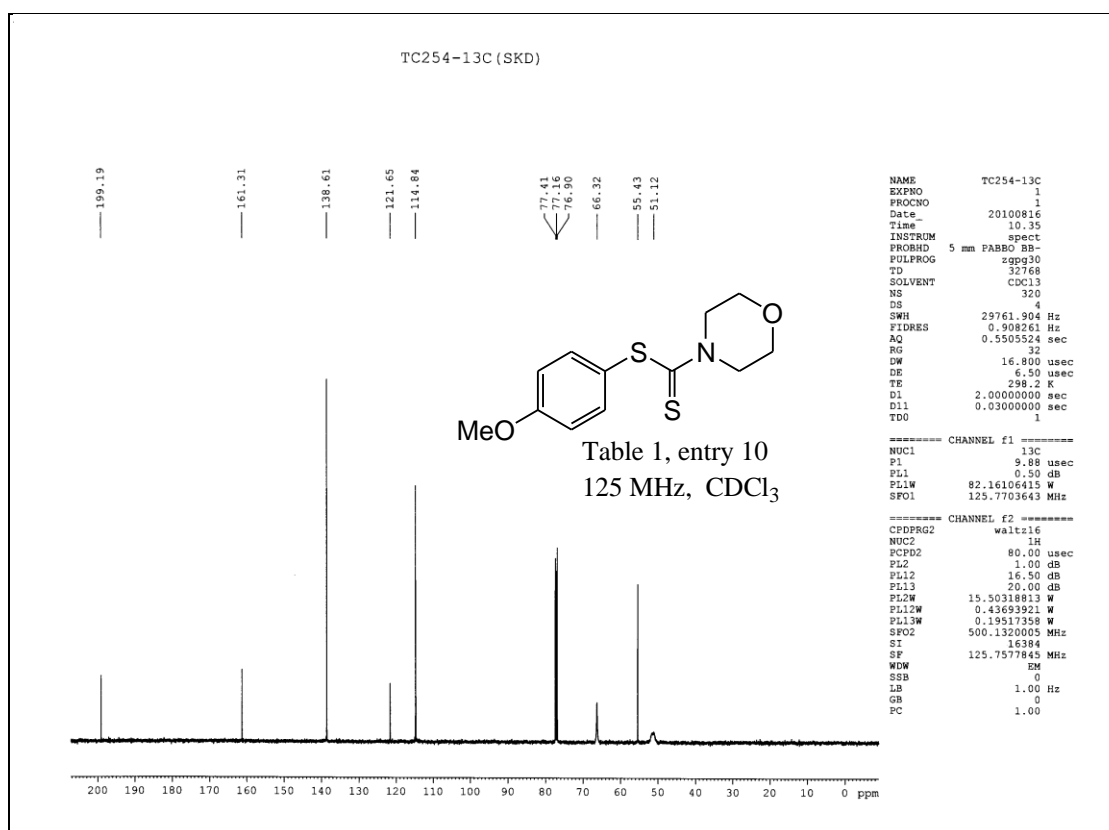

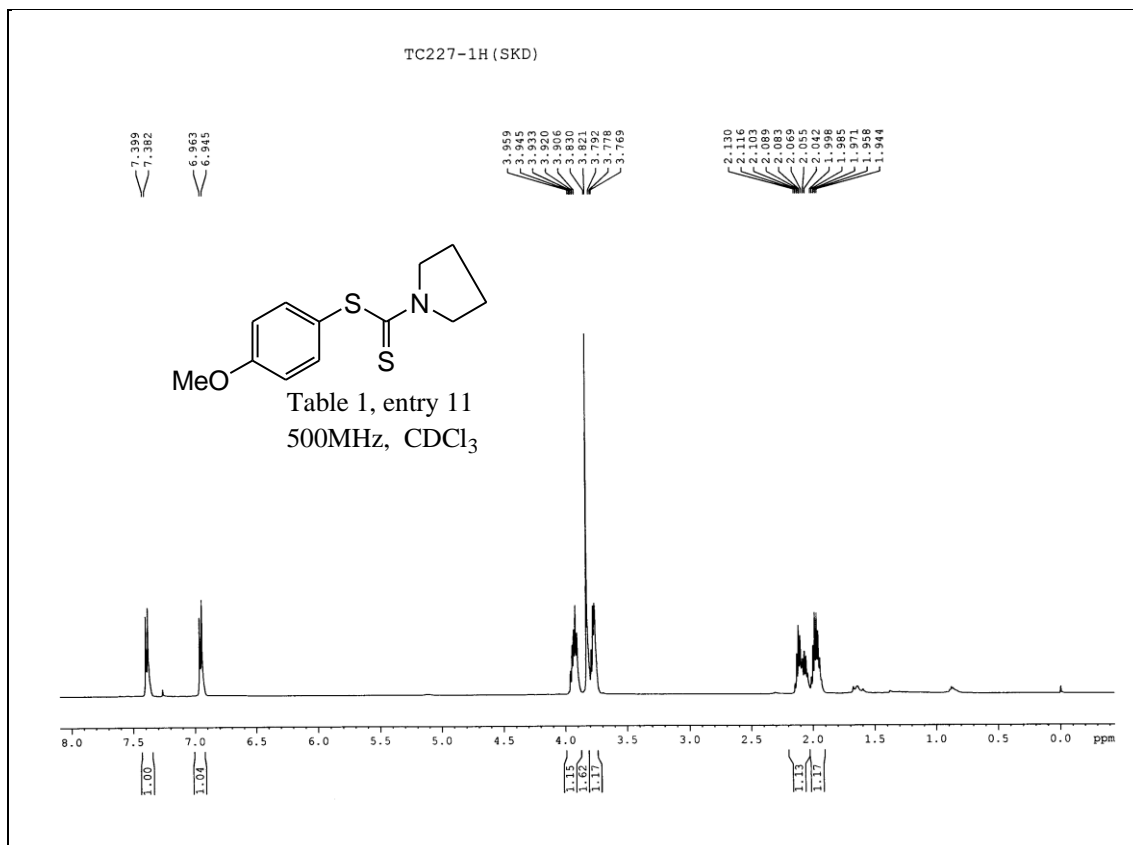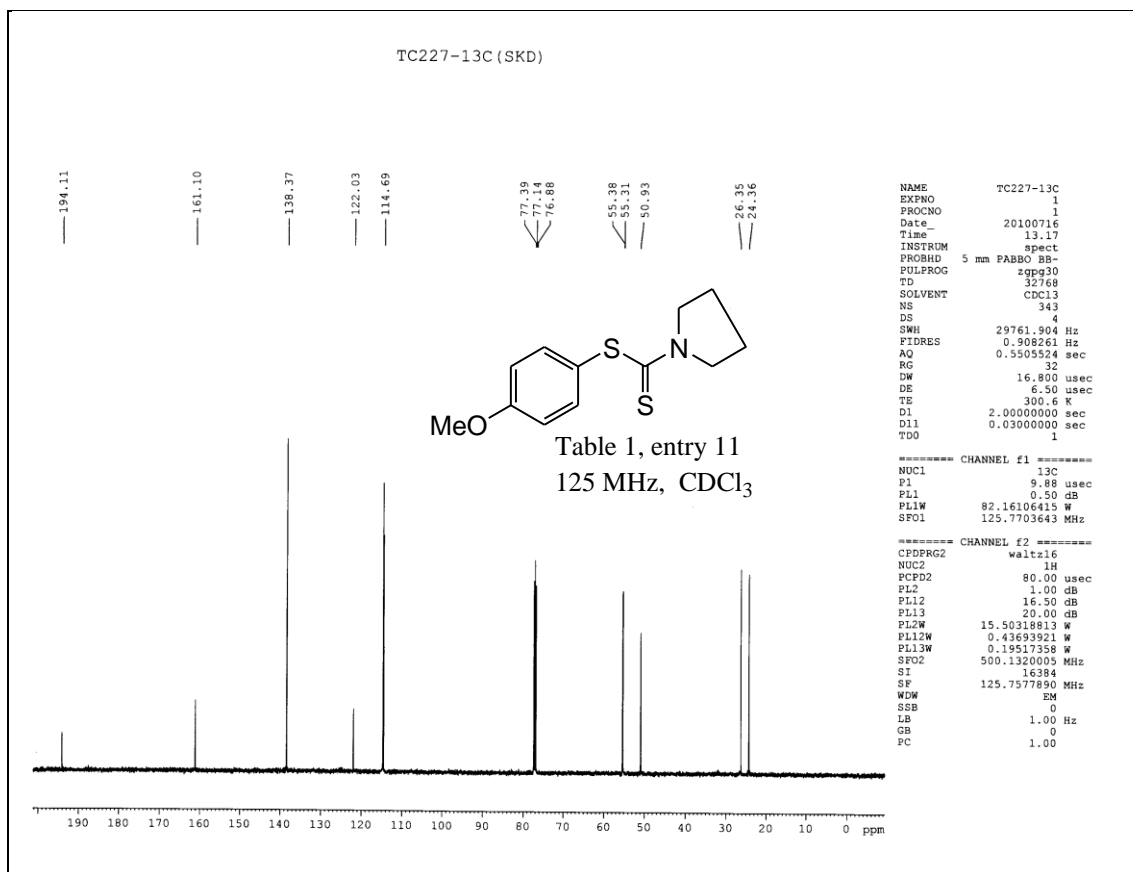

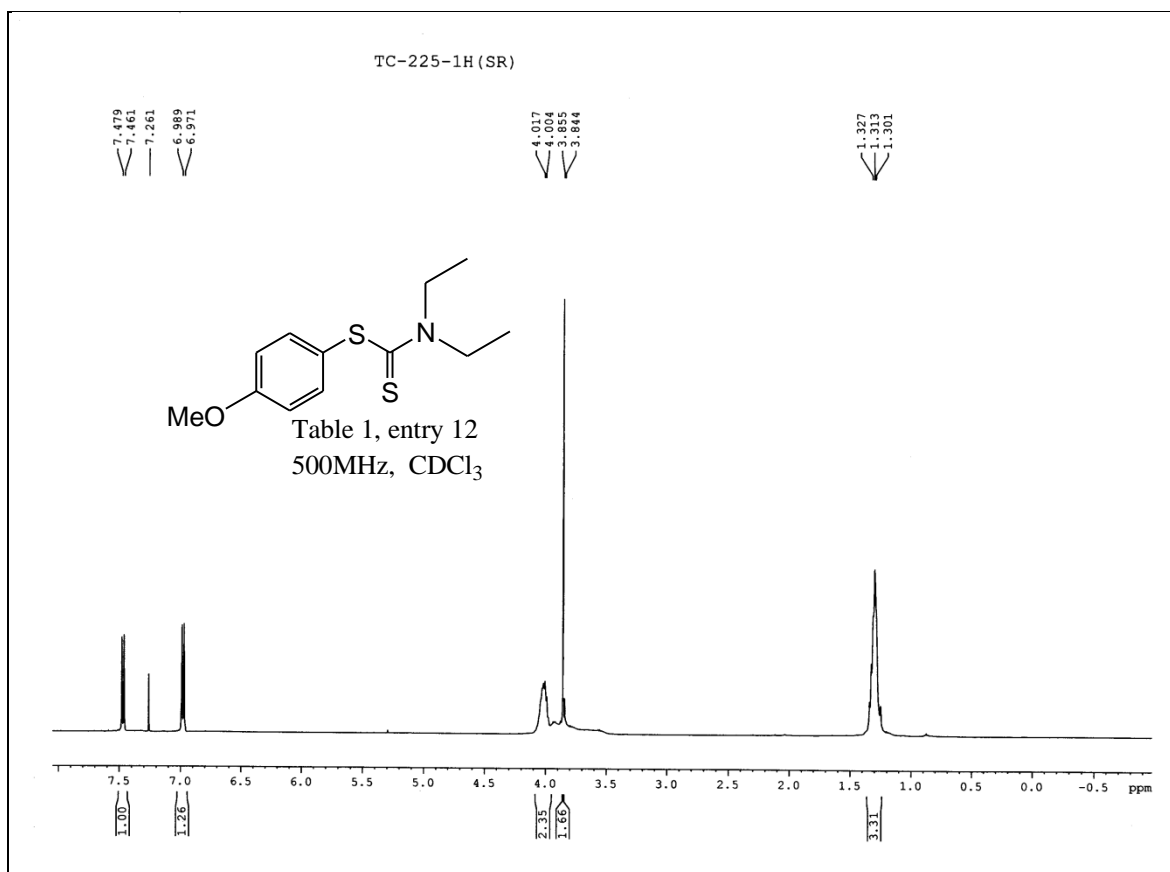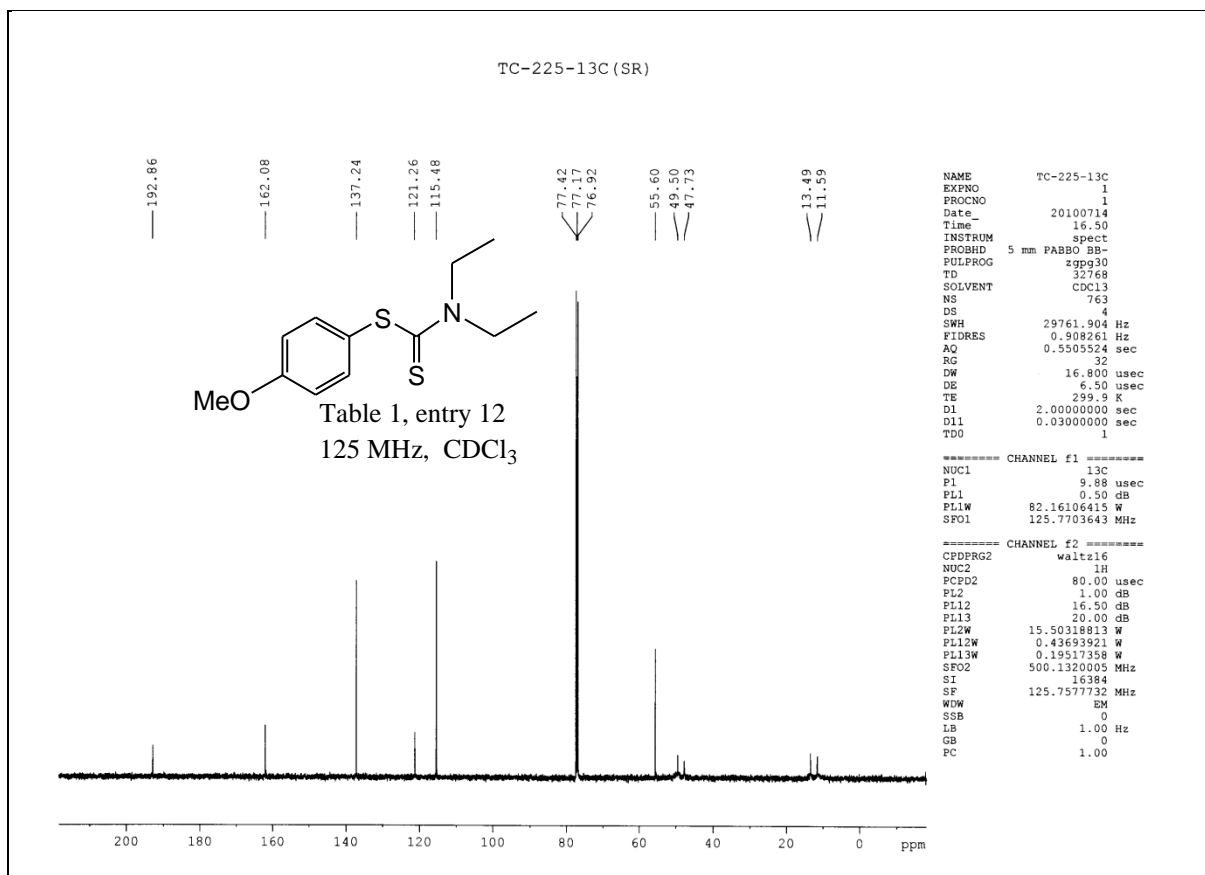

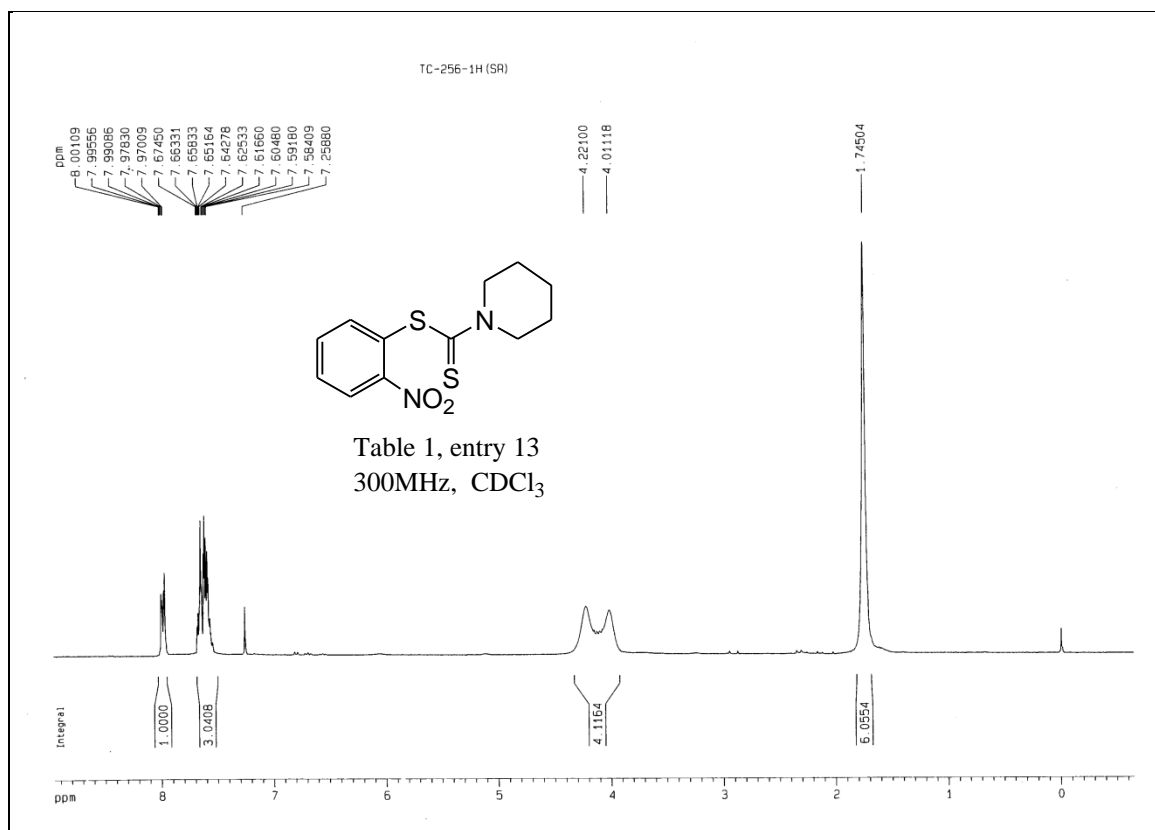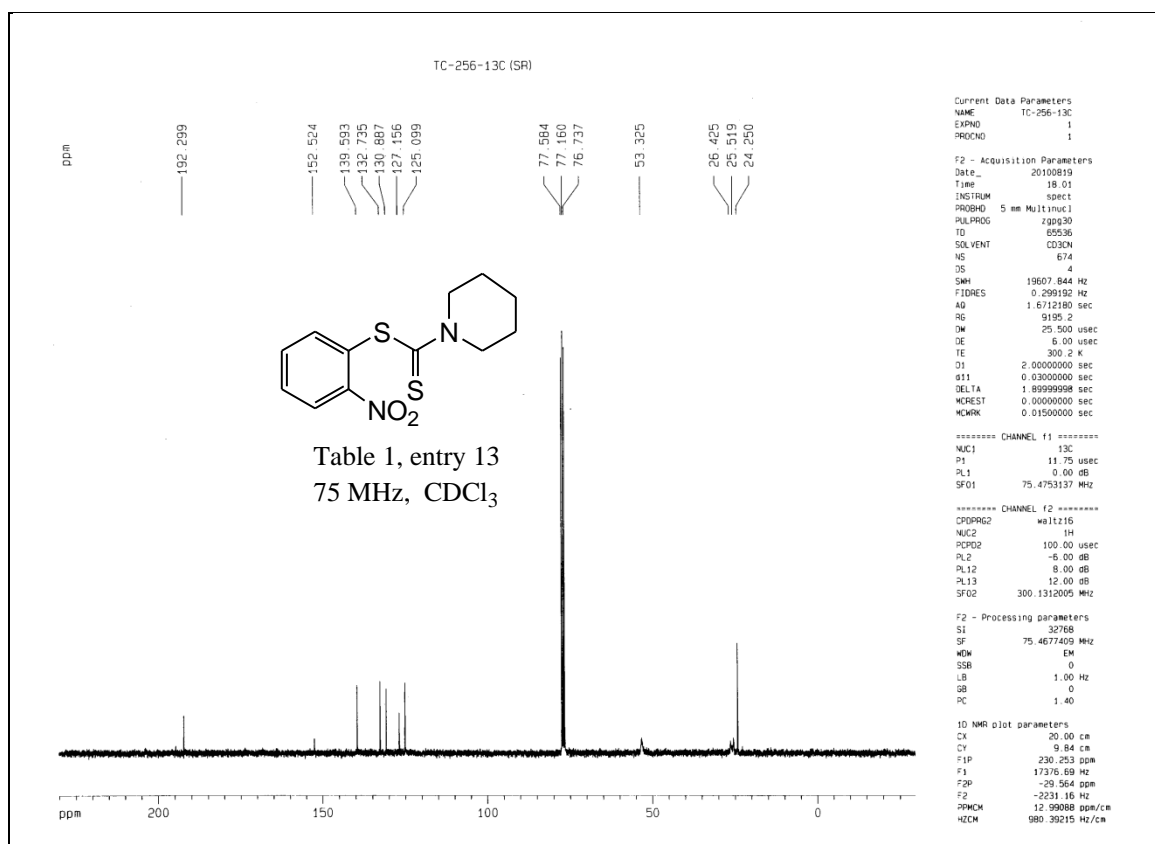

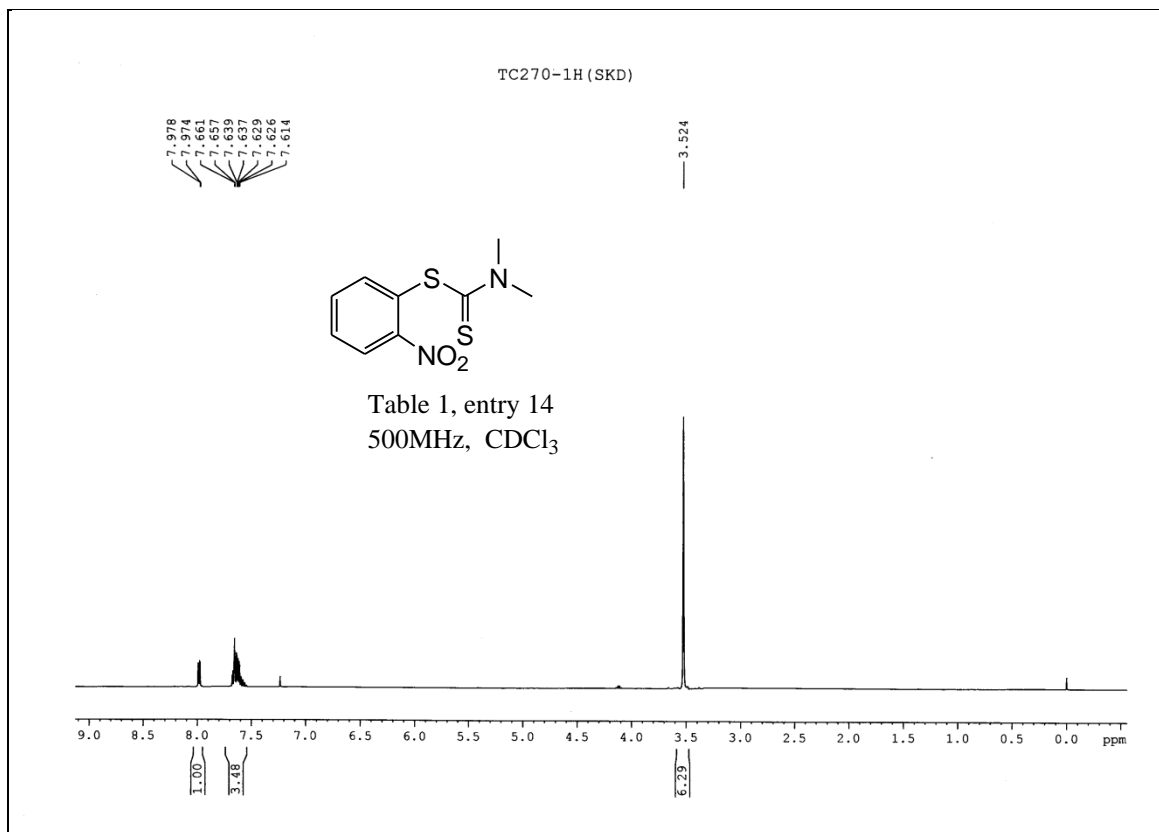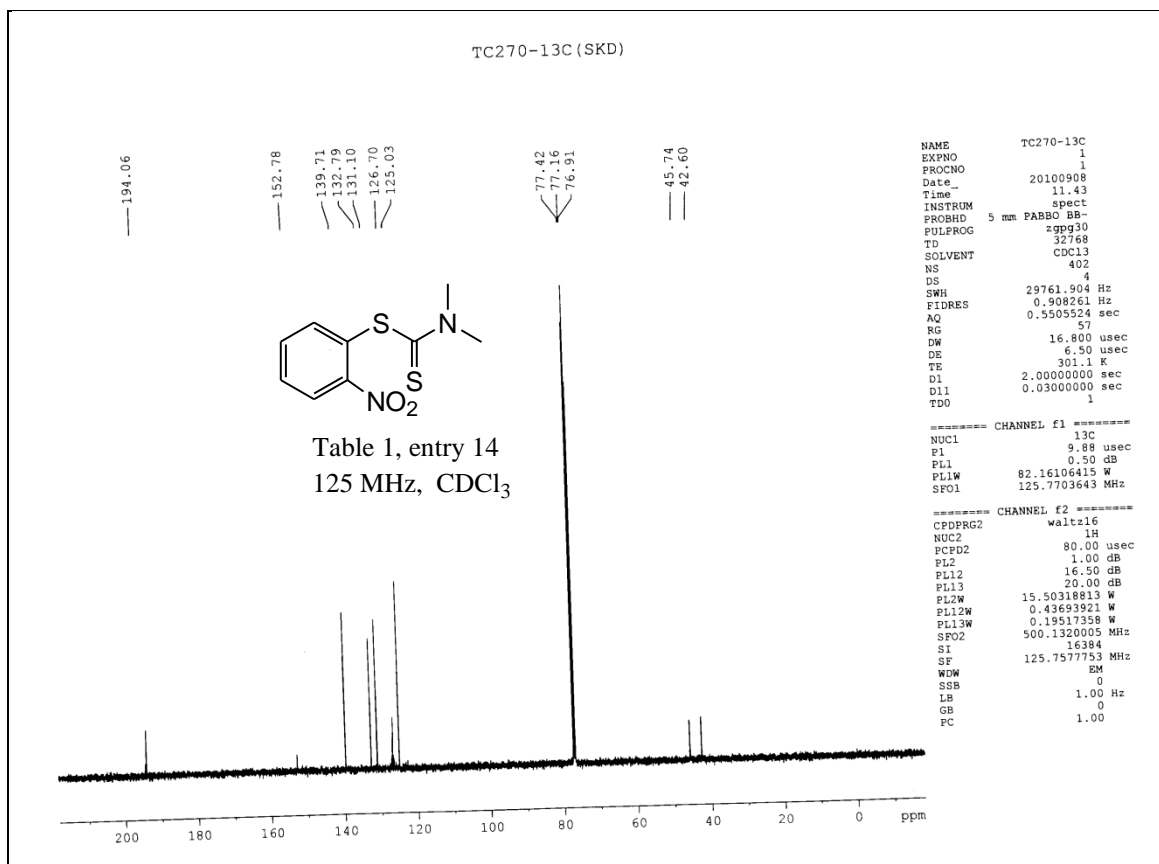

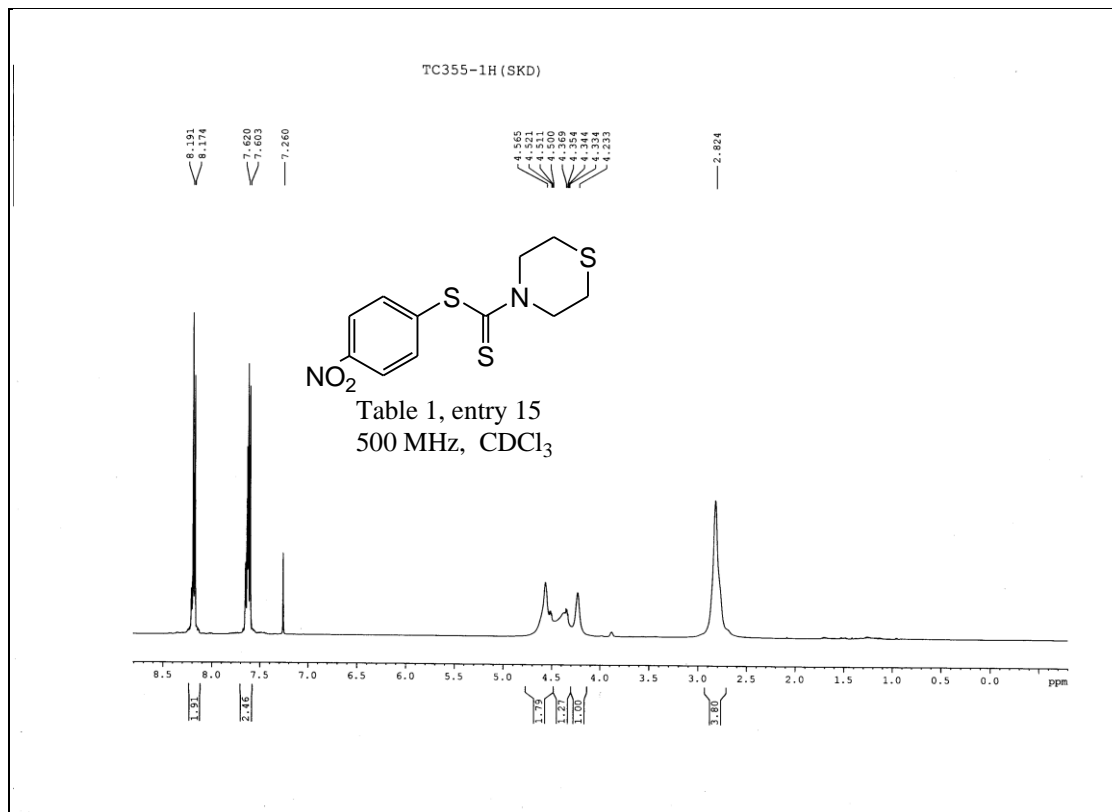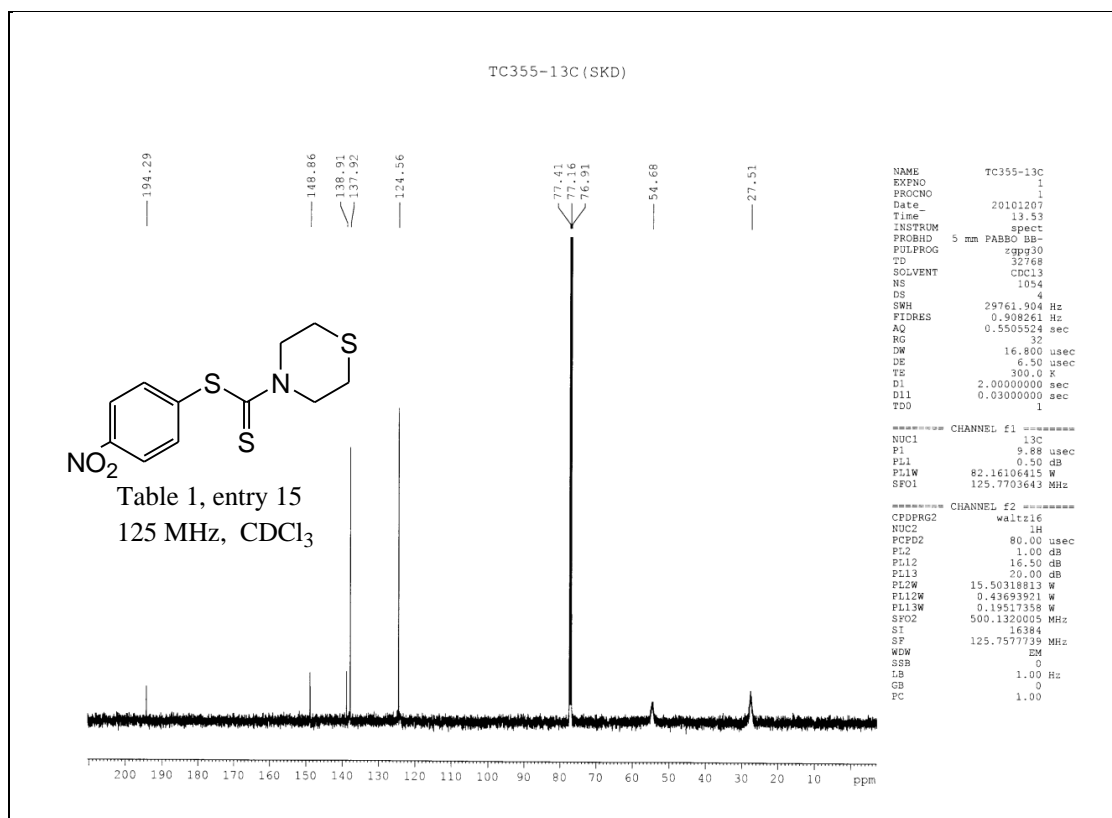



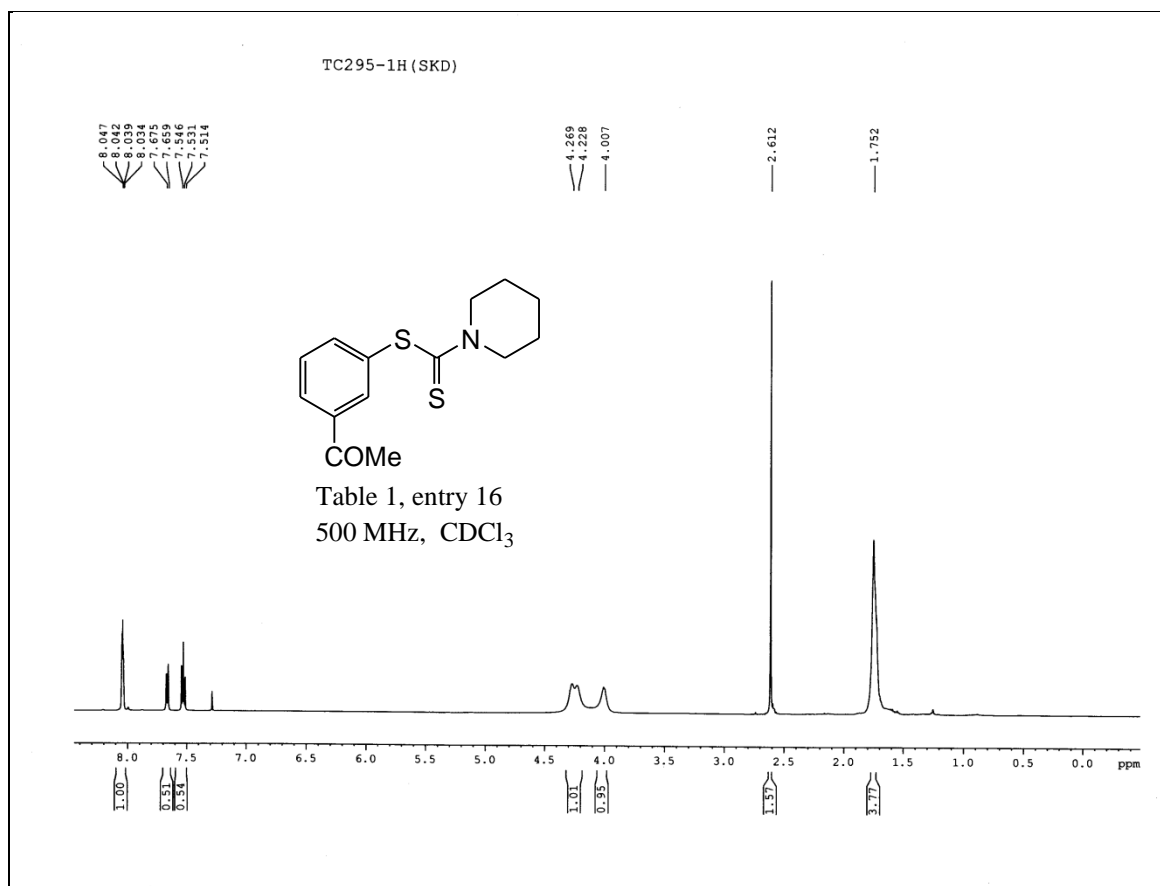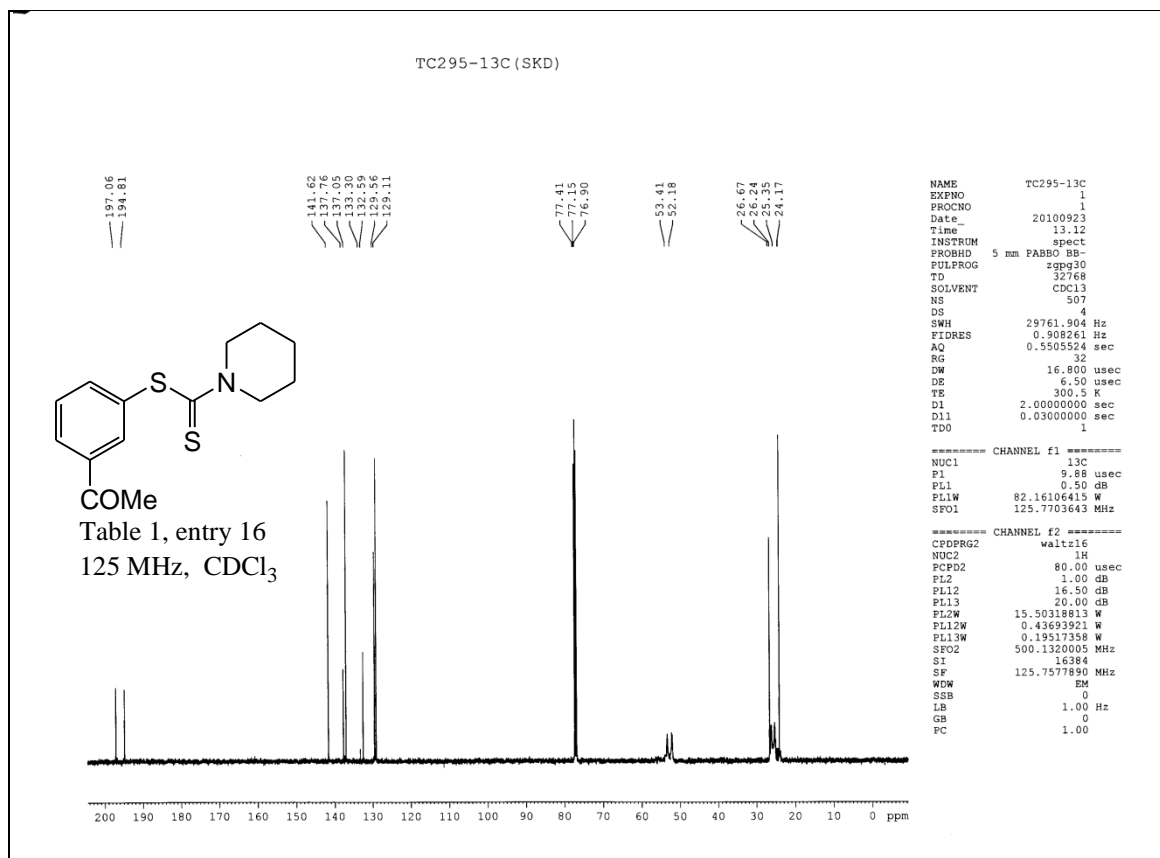

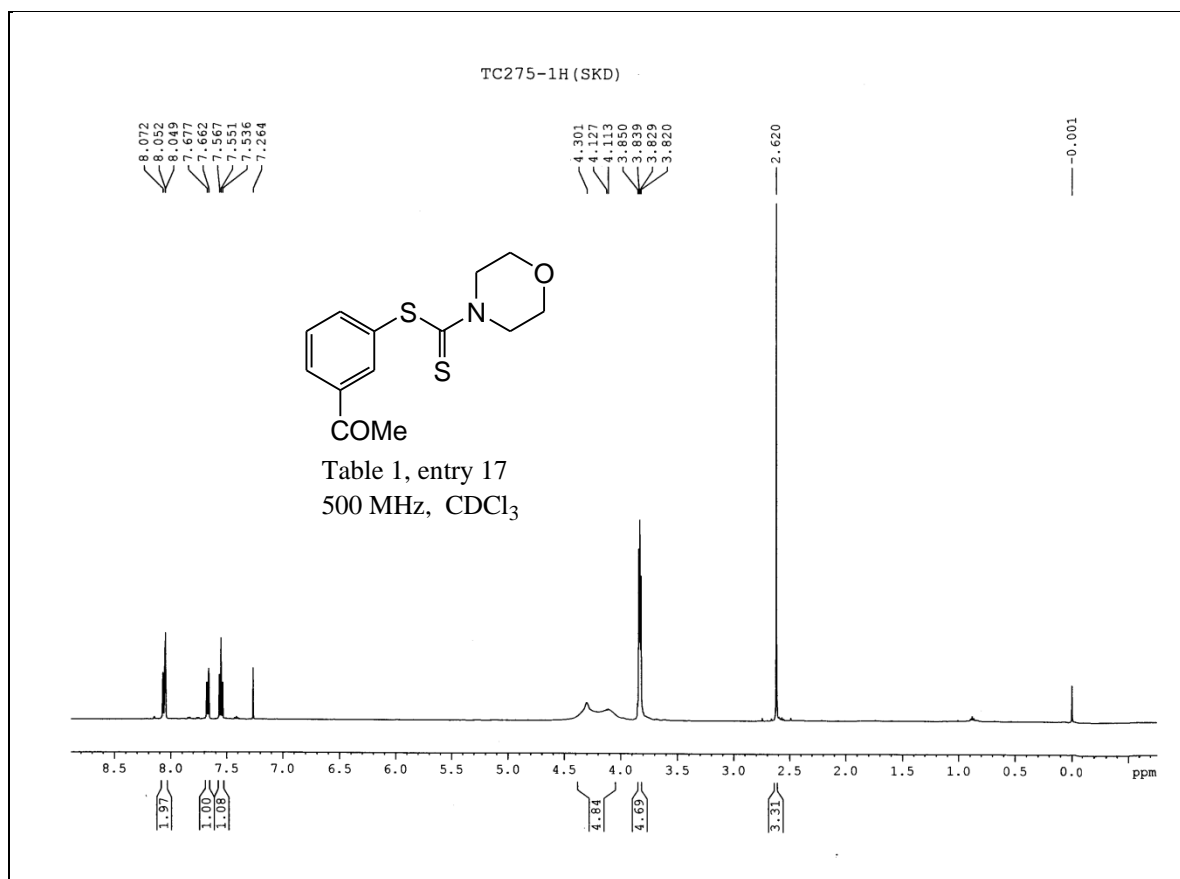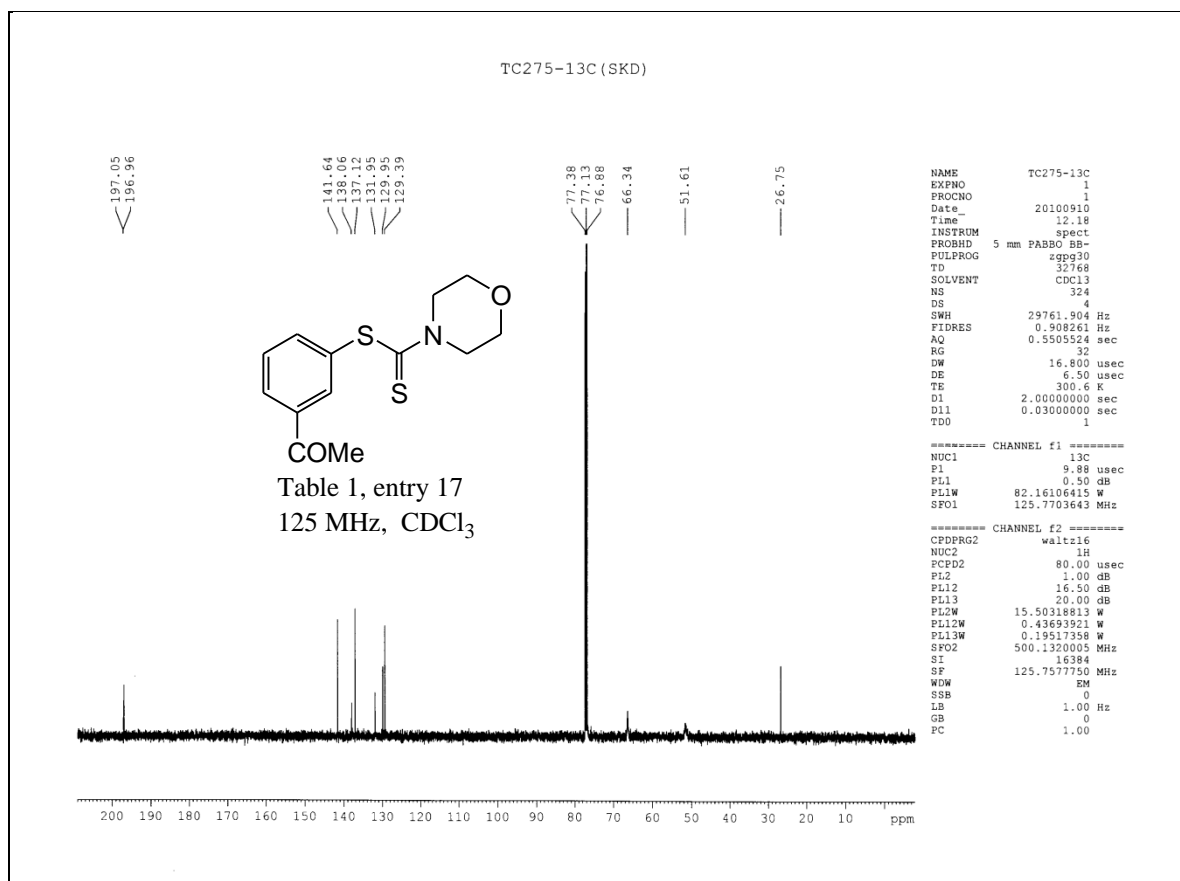

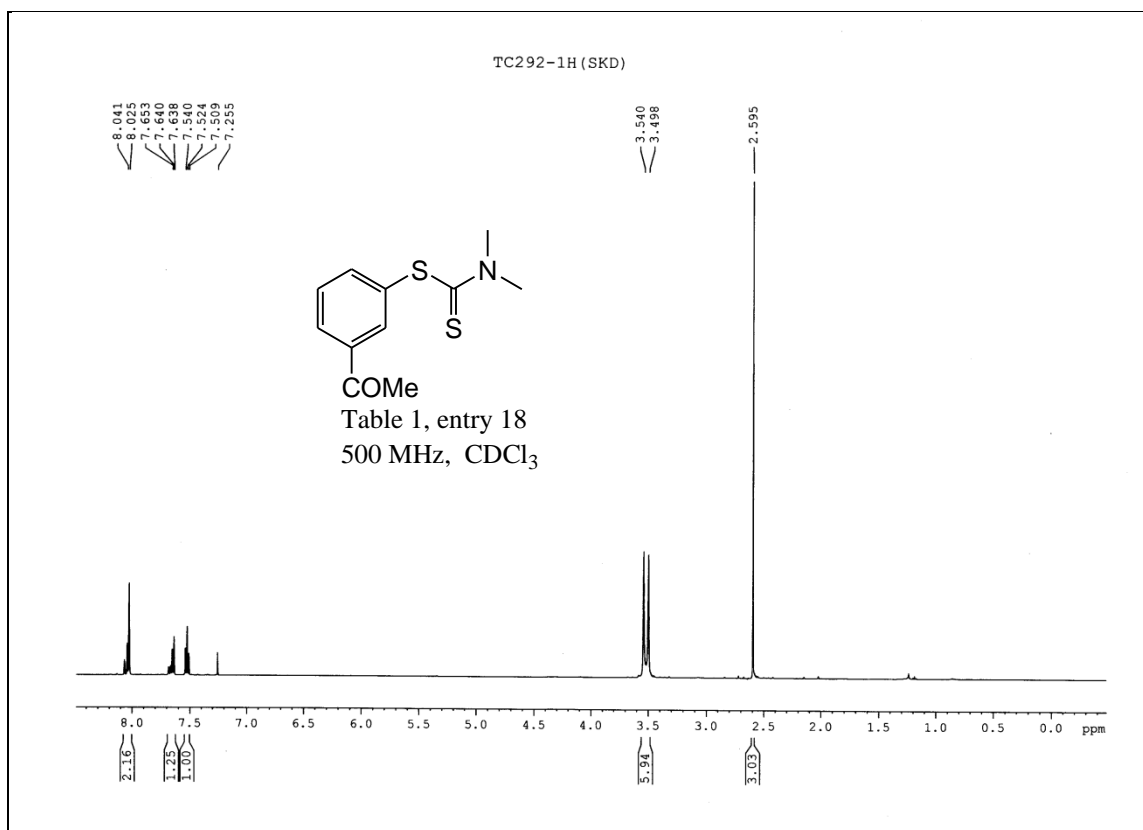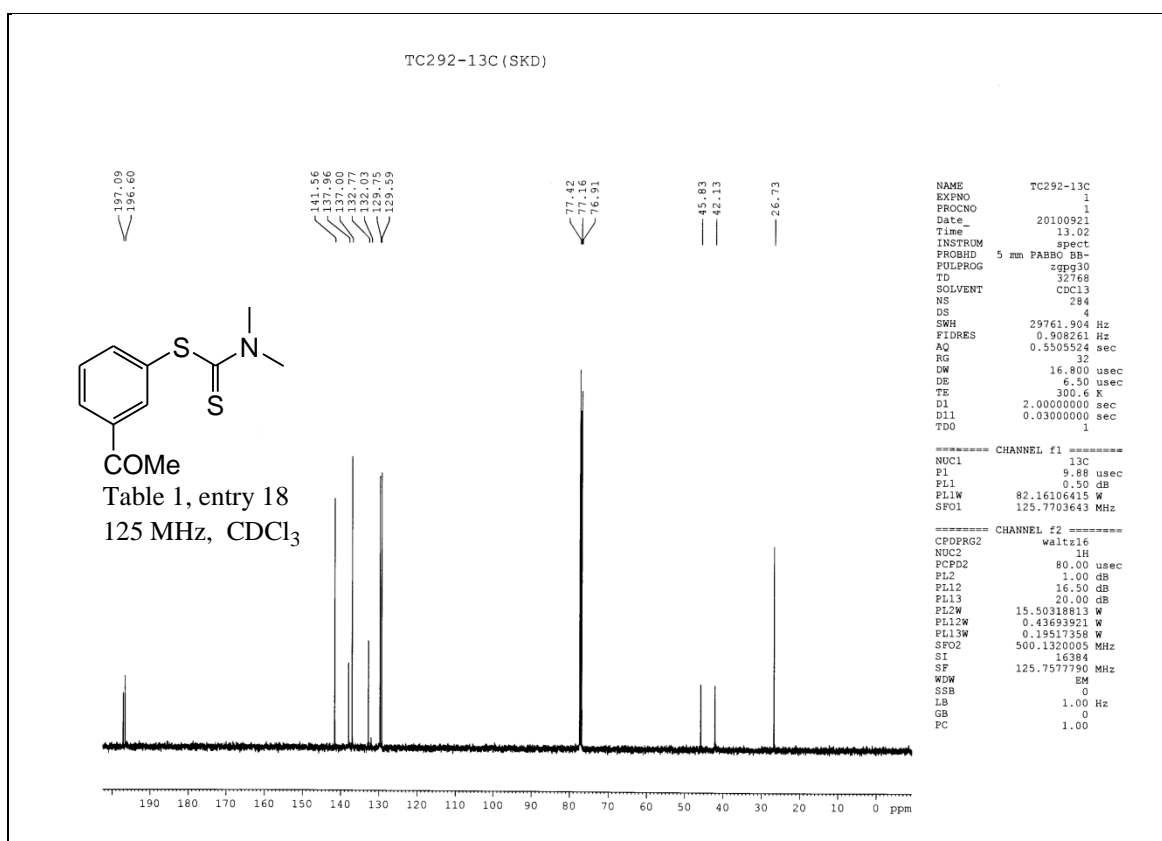

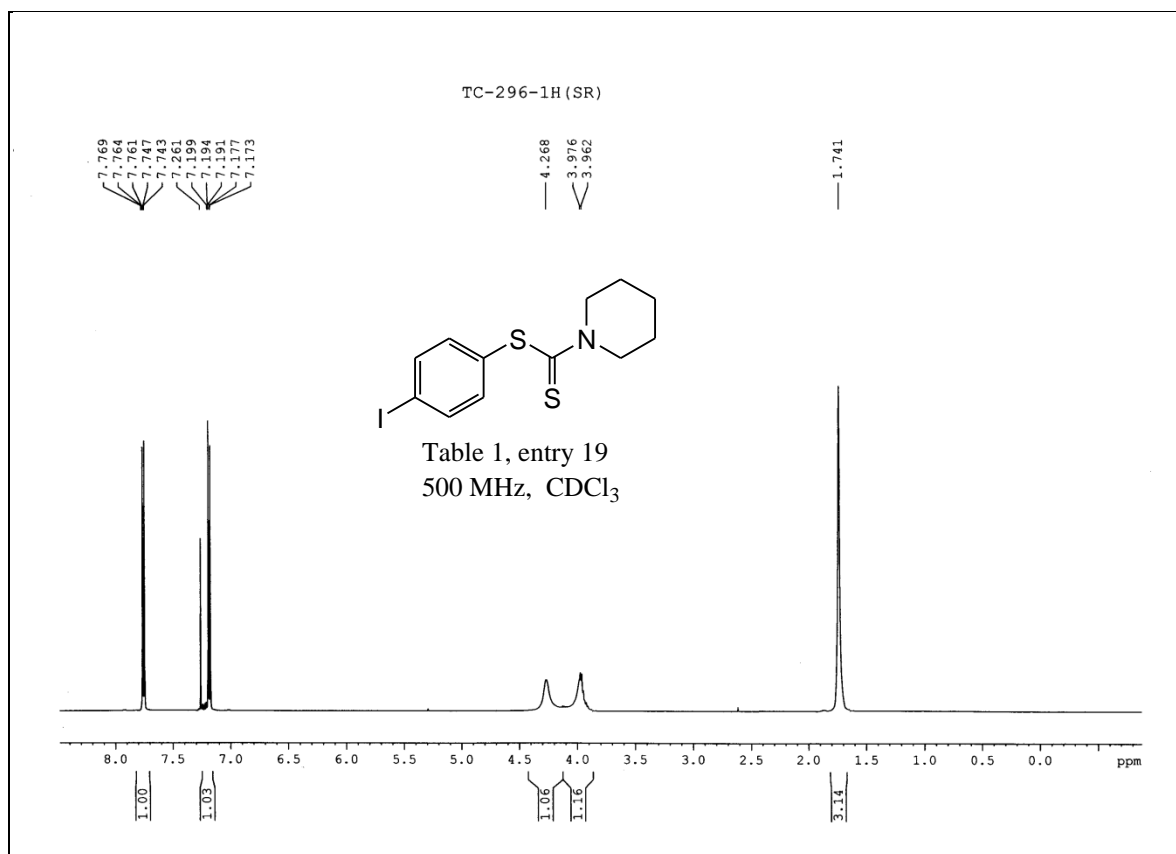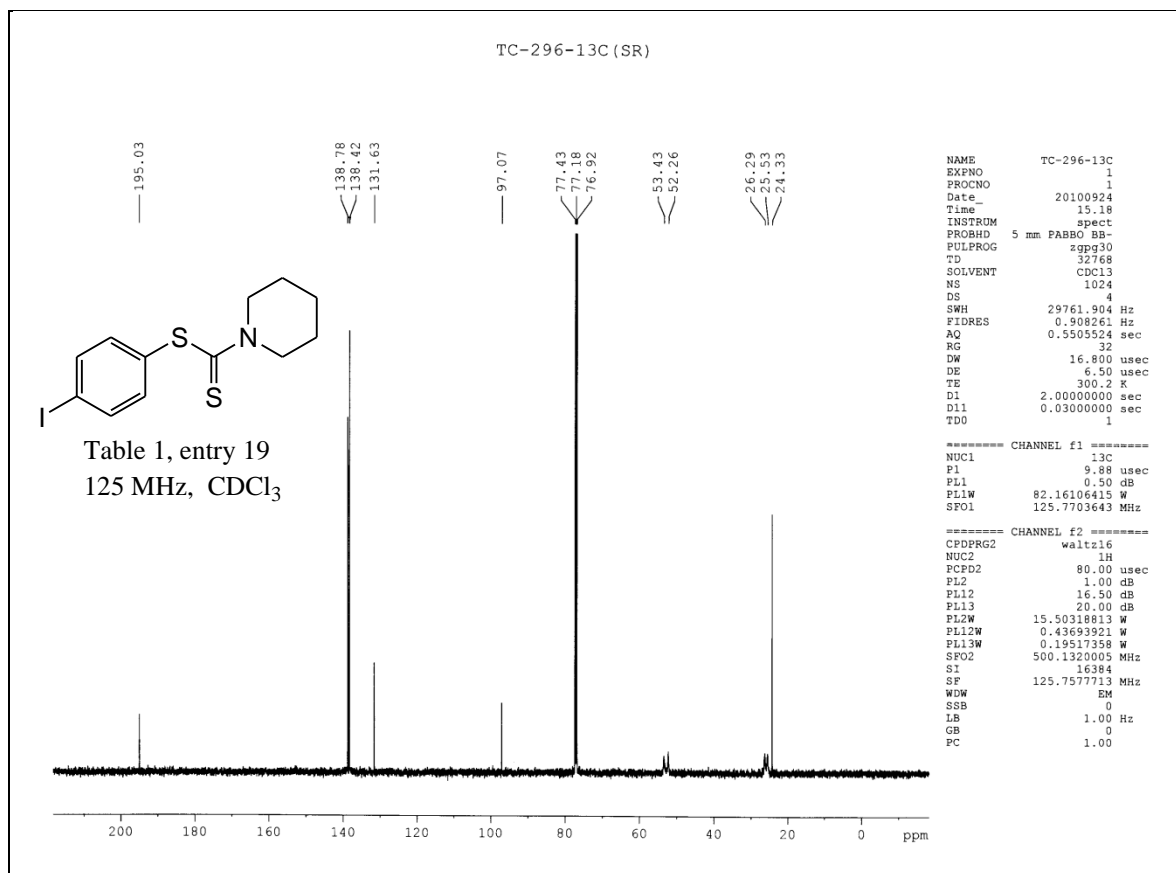

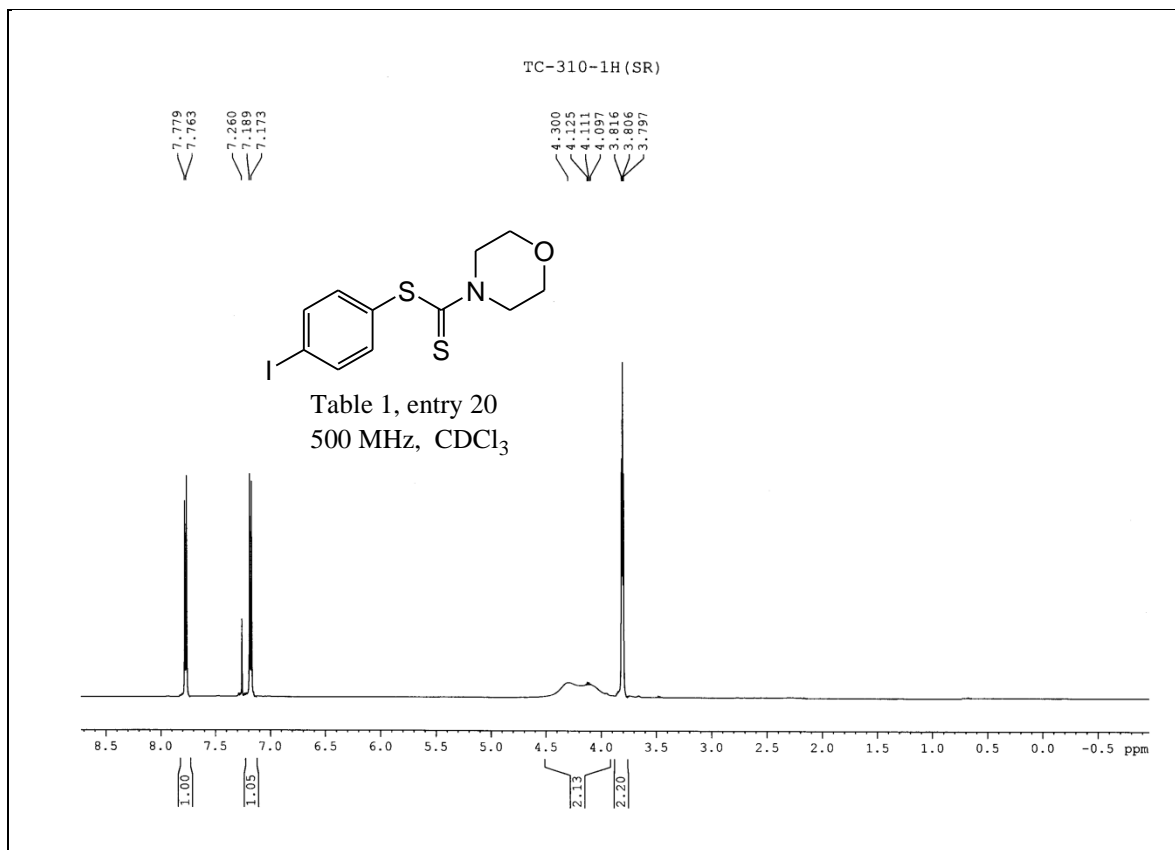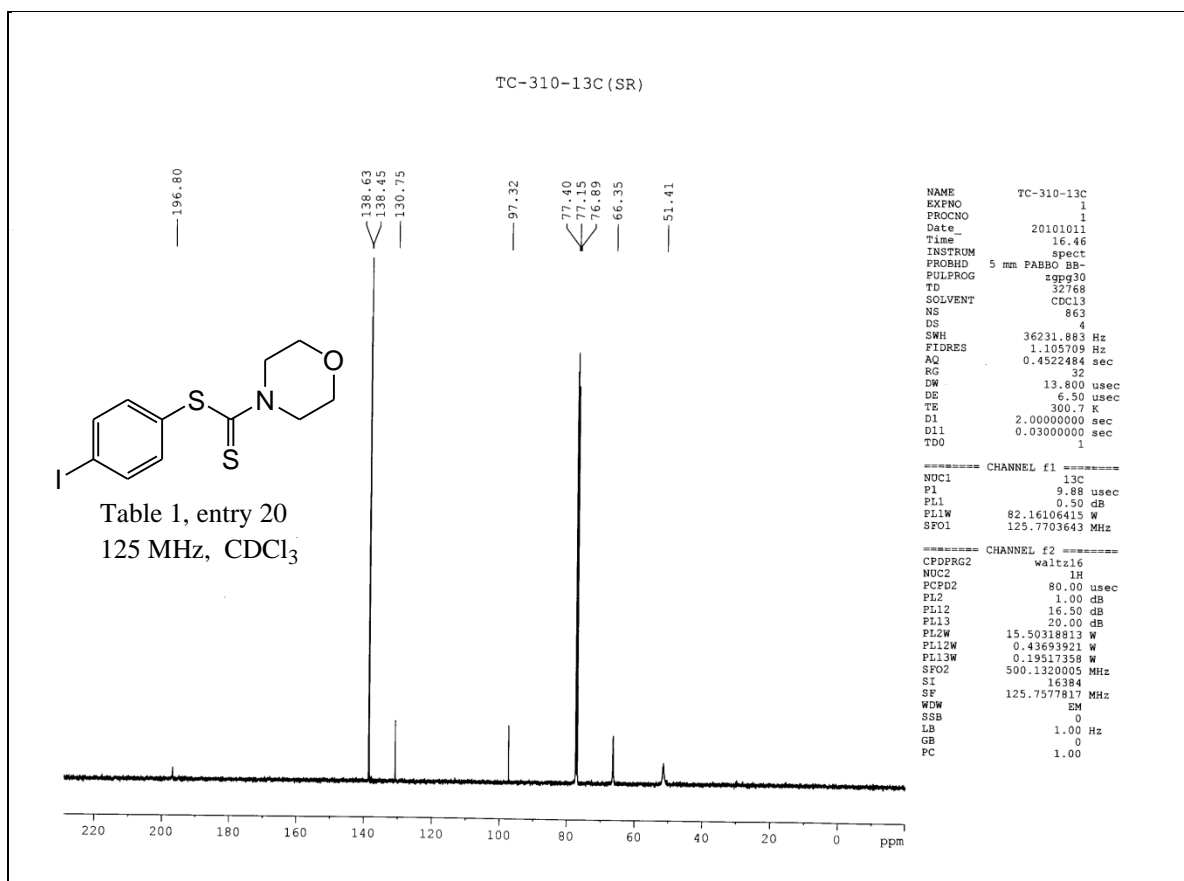

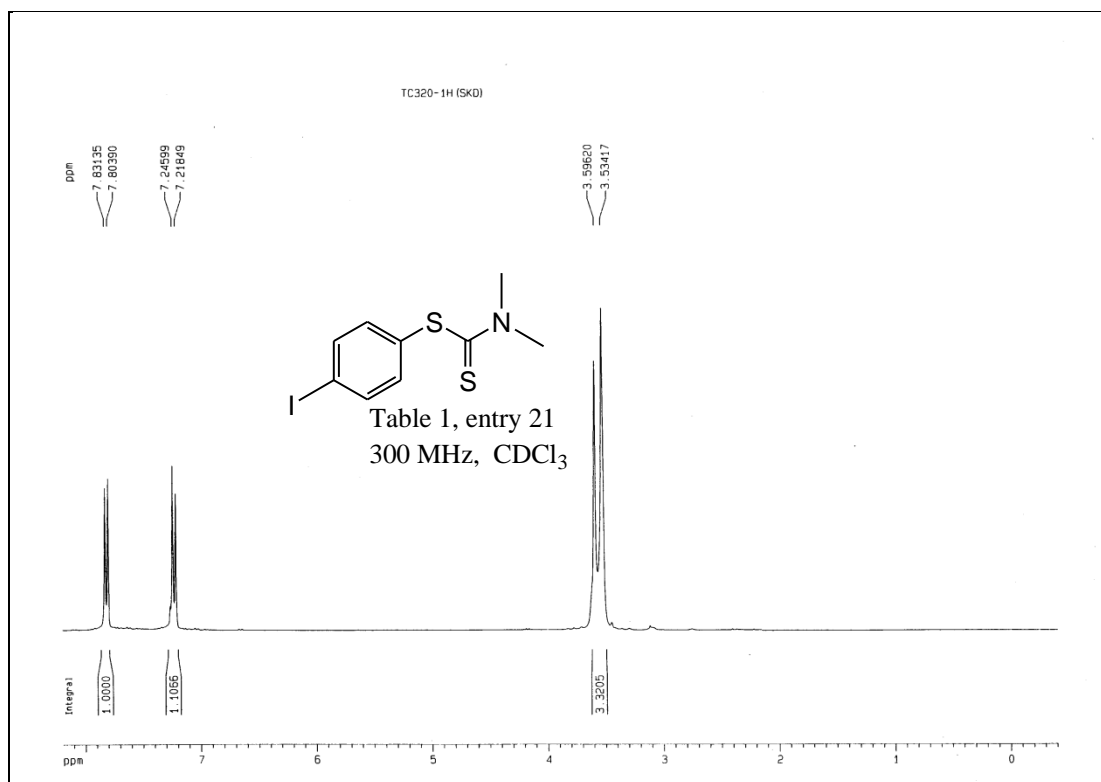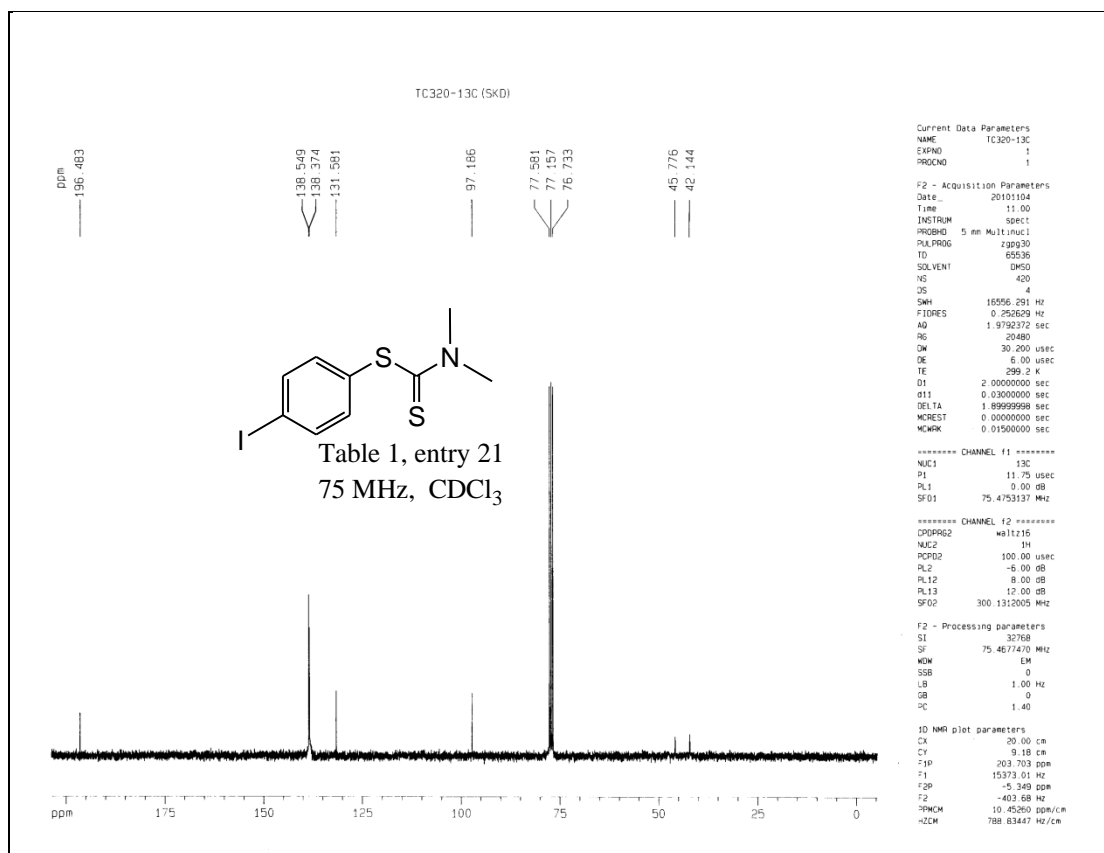

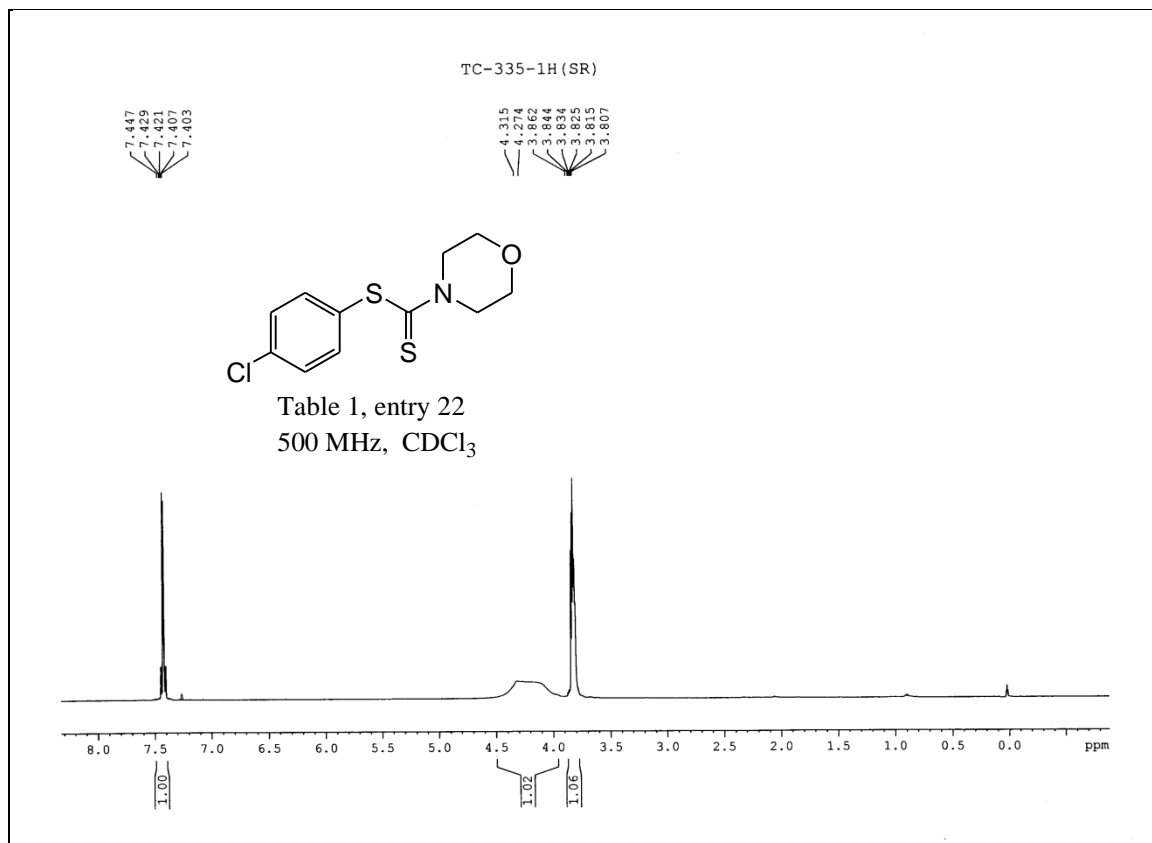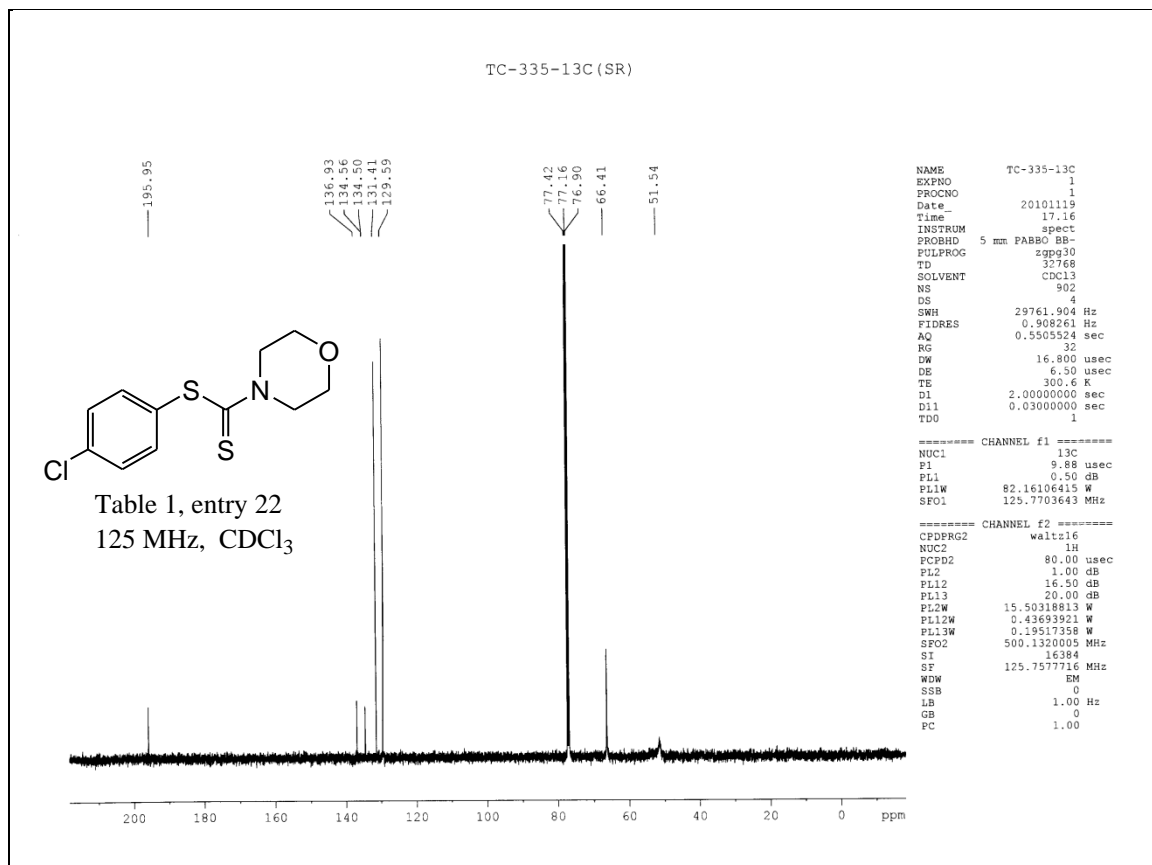

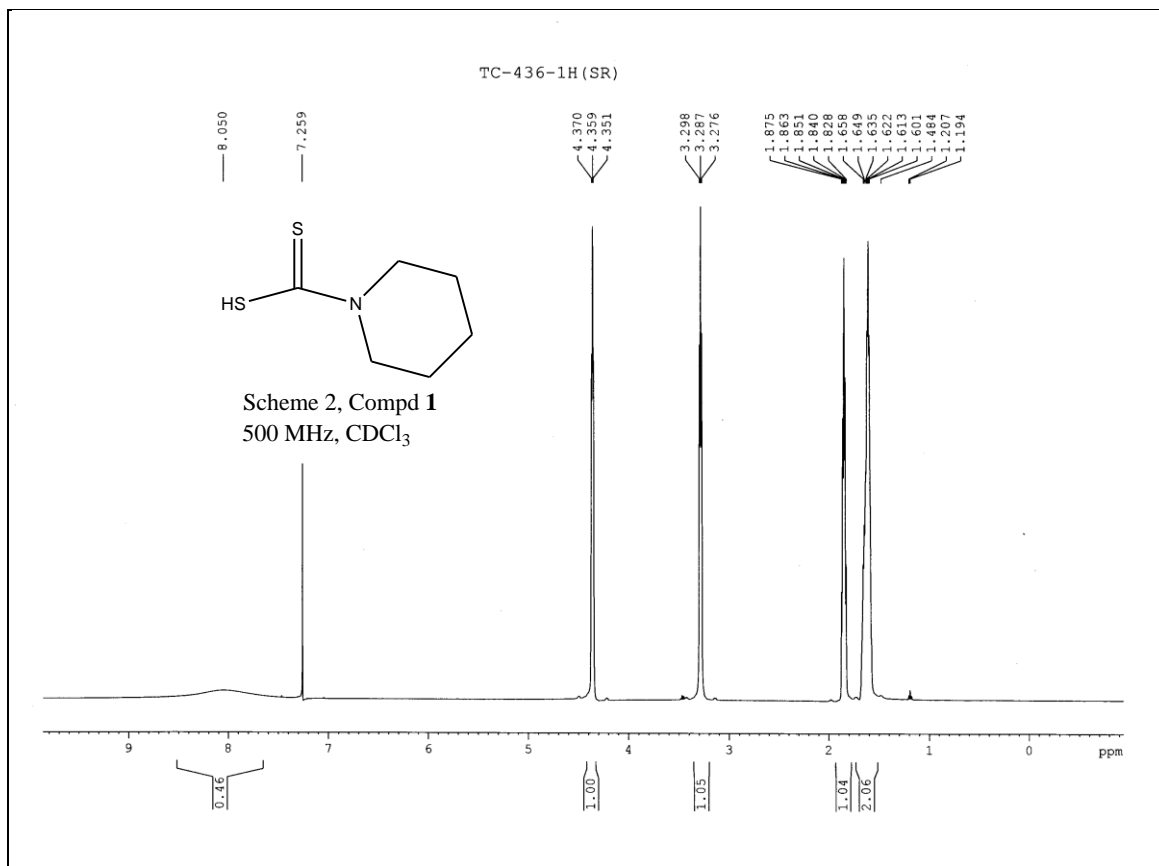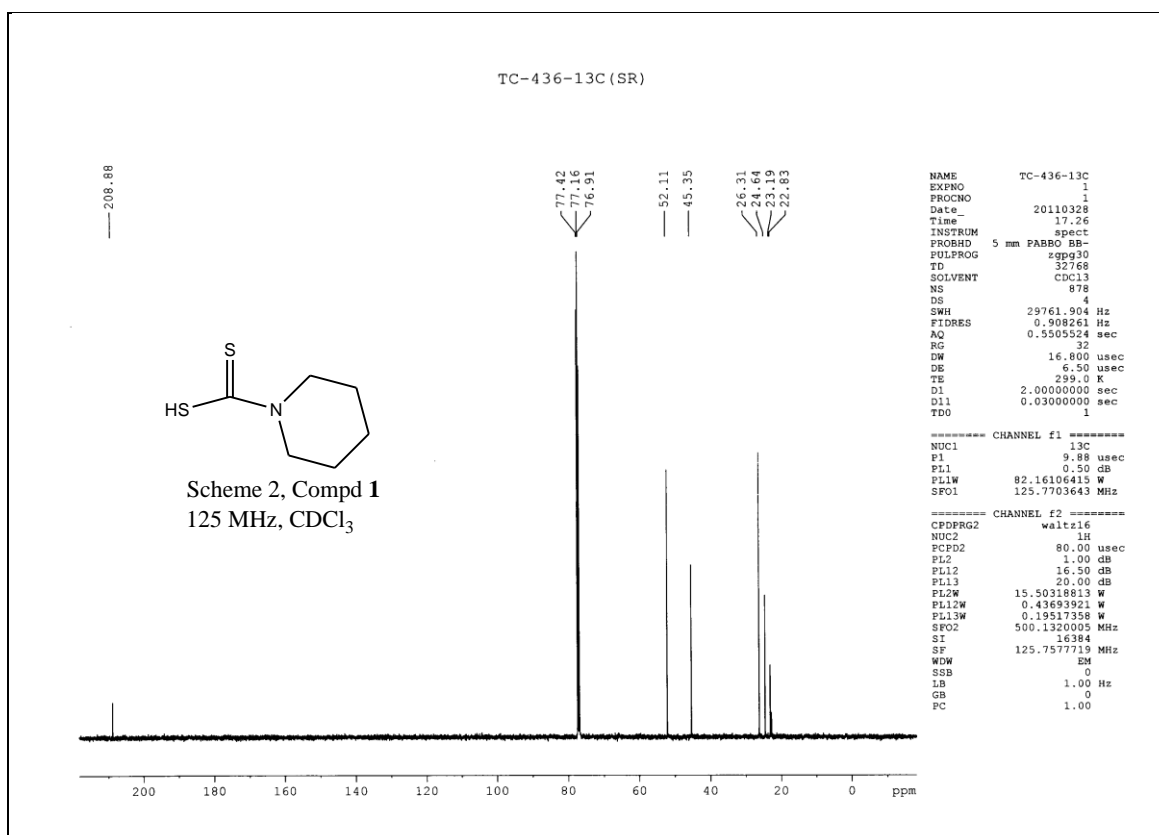

Supplement: c1gc00001b.pdf [file c1gc00001b.pdf]
